# Supplementary material for: Integration of genetic and epidemiological data to infer H5N8 HPAI virus transmission dynamics during the 2016-2017 epidemic in Italy
Source: PubMed Central journal article supplement (PMC6303474; doi:10.1038/s41598-018-36892-1), 2018-12-21
Supplement: 41598_2018_36892_MOESM1_ESM.pdf [file 41598_2018_36892_MOESM1_ESM.pdf]

**Integration of genetic and epidemiological data to infer H5N8 HPAI virus transmission dynamics during the 2016-2017 epidemic in Italy**

Mulatti, P.\*, Fusaro, A., Scolamacchia, F., Zecchin, B., Azzolini, A., Zamperin, G., Terregino, C., Cunial, G., Monne, I., Marangon, S.

*Istituto Zooprofilattico Sperimentale delle Venezie, Legnaro (Padua), Italy*

\* Corresponding Author

Supplementary Figure S1. Maximum Likelihood phylogenetic tree of the PB2 gene. The 2016-2017 Italian HPAI H5N8 isolated from poultry are marked in red. The 2016-2017 Italian HPAI H5N8 isolated from wild birds are marked in green. The light blue box shows the Italy A group; the violet box shows the Italy B group. Epidemiological clusters are marked with a yellow bar on the side. Bootstrap supports higher than 600/1000 are indicated next to the nodes; branch lengths are scaled according to the numbers of nucleotide substitutions per site.

## PB2

- 2016-2017 Italian HPAI H5N8 from poultry
- 2016-2017 Italian HPAI H5N8 from wild birds

A/chicken/Italy/17VIR10437-2/2017-11-21\_case80  
A/duck/Italy/17VIR9907-2/2017-11-3\_case68  
A/chicken/Italy/17VIR10053/2017-11-7\_case672  
A/chicken/Italy/17VIR10131-1/2017-11-10\_case79  
A/chicken/Italy/17VIR10083/2017-11-6\_case75  
A/chicken/Italy/17VIR10082/2017-11-9\_case76  
A/chicken/Italy/17VIR9679/2017-10-28\_case60  
A/turkey/Italy/17VIR8819-3/2017-10-9\_case48  
A/turkey/Italy/17VIR9106-2/2017-10-13\_case50  
A/turkey/Italy/17VIR9246/2017-10-18\_case56  
A/chicken/Italy/17VIR9630/2017-11-31\_case61  
A/duck/Italy/17VIR9906-1/2017-11-3\_case67  
A/duck/Italy/17VIR9533/2017-10-25\_case59  
A/turkey/Italy/17VIR9699/2017-10-30\_case62  
A/turkey/Italy/17VIR9908/2017-11-1\_case65  
A/layer/Italy/17VIR9941-1/2017-11-3\_case70  
A/turkey/Italy/17VIR9773/2017-10-31\_case63  
A/turkey/Italy/17VIR9942-2/2017-11-4\_case69  
A/chicken/Italy/17VIR10130-2/2017-11-9\_case77  
A/chicken/Italy/17VIR10132-1/2017-11-10\_case78  
A/turkey/Italy/17VIR10133-8/2017-11-6\_case74  
A/turkey/Italy/17VIR9905-1/2017-11-2\_case66  
A/turkey/Italy/17VIR9245/2017-10-18\_case55  
A/quail/Italy/17VIR9455-2/2017-10-20\_case57  
A/chicken/Italy/17VIR10107/2017-10-16\_case51  
A/chicken/Italy/17VIR9456/2017-10-18\_case58  
A/chicken/Italy/17VIR8821/2017-10-9\_case44  
A/chicken/Italy/17VIR9048-2/2017-10-12\_case49  
A/chicken/Italy/17VIR8885/2017-10-10\_case46  
A/turkey/Italy/17VIR7337-1/2017-9-2\_case36  
A/duck/Italy/17VIR9349/2017-9-25\_case41  
A/swan/Italy/17VIR8513/2017-9-1  
A/goose/Italy/17VIR6358-3/2017-8-3\_case28  
A/pheasant/Italy/17VIR7065-21/2017-8-19\_case31  
A/turkey/Italy/17VIR9775-1/2017-10-31\_case64  
A/chicken/Italy/17VIR7062-1/2017-8-25\_case34  
A/mallard/Italy/17VIR6103-1/2017-7-25  
A/swan/Italy/17VIR7064-1/2017-9-25  
A/swan/Italy/17VIR9038-1/2017-10-11  
A/swan/Italy/17VIR9038-2/2017-10-11  
A/swan/Italy/17VIR9836-1/2017-8-16  
A/turkey/Italy/17VIR10983-22/2017-12-11\_case83  
A/wild\_goose/Italy/17VIR9841/2017-10-23  
A/pigeon/Italy/17VIR9842/2017-10-23  
A/kestrel/Italy/17VIR9840/2017-10-23  
A/chicken/Italy/17VIR8678/2017-10-5\_case42  
A/chicken/Italy/17VIR9868-1/2017-11-2\_case73  
A/chicken/Italy/17VIR9846-4/2017-11-3\_case71  
A/chicken/Italy/17VIR9113/2017-10-16\_case53  
A/swan/Italy/17VIR9017/2017-10-11  
A/duck/Italy/17VIR8993/2017-10-16\_case54  
A/turkey/Italy/17VIR8866-3/2017-10-11\_case47  
A/turkey/Italy/17VIR8199-1/2017-9-25\_case38  
A/chicken/Italy/17VIR10408/2017-11-20\_case81  
A/duck/Italy/17VIR10767-13/2017-12-1\_case82  
A/turkey/Italy/17VIR6930-4/2017-8-22\_case32  
A/turkey/Italy/17VIR5878-3/2017-7-23\_case20  
A/duck/Italy/17VIR8200-12/2017-9-25\_case40  
A/chicken/Italy/17VIR8783-5/2017-10-6\_case43  
A/chicken/Italy/17VIR8744-9/2017-10-6\_case45  
A/turkey/Italy/17VIR7197-1/2017-8-28\_case35  
A/turkey/Italy/17VIR4407-1/2017-5-29\_case16  
A/heon/Italy/17VIR4580/2017-5-30  
A/turkey/Italy/17VIR6928-5/2017-8-22\_case33  
A/turkey/Italy/17VIR5773-2/2017-7-19\_case17  
A/goose/Italy/17VIR7626-5/2017-9-8\_case37  
A/turkey/Italy/17VIR1452-22/2017-2-16\_case6  
A/turkey/Italy/17VIR5964-8/2017-7-27\_case21  
A/turkey/Italy/17VIR9049-2/2017-10-12\_case52  
A/turkey/Italy/17VIR6882-1/2017-8-21\_case30  
A/turkey/Italy/17VIR8106-3/2017-9-1\_case23  
A/turkey/Italy/17VIR6469-2/2017-8-8\_case29  
A/duck/Italy/17VIR5769-5/2017-7-19\_case18  
A/turkey/Italy/17VIR6355-1/2017-8-4\_case25  
A/turkey/Italy/17VIR6356-1/2017-8-4\_case26  
A/chicken/Italy/17VIR5794-5/2017-7-20\_case19  
A/turkey/Italy/17VIR5357-2/2017-8-4\_case27  
A/turkey/Italy/17VIR8275-3/2017-9-26\_case39  
A/turkey/Italy/17VIR6111-16/2017-7-31\_case24  
A/chicken/Italy/17VIR5986-1/2017-7-27\_case22  
A/chicken/Italy/17VIR2788/2017-3-28\_case13  
A/swan/Italy/17VIR3594-3/2017-4-27  
A/turkey/Italy/17VIR576-11/2017-1-23\_case2  
A/chicken/Italy/17VIR3078/2017-4-7\_case14  
A/turkey/Italy/17VIR2722-29/2017-3-28\_case12  
A/turkey/Italy/17VIR3192-1/2017-4-11\_case15  
A/chicken/Italy/17VIR2294-5/2017-3-16\_case10  
A/chicken/Sergiyev\_Posad/39/2017\_H5N8  
A/chicken/Sergiyev\_Posad/38/2017\_H5N8  
A/mute\_swan/Krasnodar/25/2017\_H5N8  
A/swan/Italy/17VIR537-2/2017-1-19  
A/decoy\_duck/France/161104e/2016\_H5N8  
H5N8 Europe 2016  
H5N8 Russia 2017  
H5N8 Europe 2016-2017  
A/turkey/Rostov/11/2017\_H5N8  
A/goose/Krasnodar/3144/2017\_H5N8  
A/swan/Italy/17VIR537-2/2017-1-19  
A/duck/Mongolia/118/2015\_H4N6  
A/duck/Mongolia/2015  
H5N8 Qinghai 2016  
H5N8 Europe 2016  
A/turkey/Italy/17VIR538-1/2017-1-20\_case1  
A/painted\_stork/India/10CA03/2016\_H5N8  
A/duck/India/10CA01/2016\_H5N8  
A/chicken/Astrakhan/3131/2016\_H5N8  
A/great\_creted\_grebe/Uvs-Nuur\_Lake/341/2016\_H5N8  
A/duck/Mongolia/127/2015\_H4N6  
A/duck/Mongolia/101/2015\_H4N6  
wild birds Asia 2013-2015  
A/mallard/Republic\_of\_Georgia/2/2012\_H4N6  
wild birds Asia 2009-2010  
H7N1 Mongolia 2010  
A/common\_shelduck/Mongolia/2185/2011\_H3N8  
A/garganey/Altai/1213/2007\_H5N2  
H5N8 Europe 2016-2017  
A/Environment/Chongqing/45208/2015\_H5N6  
H5N8 Taiwan 2015  
H1N1 Mongolia 2010  
A/common\_coot/Republic\_of\_Georgia/1/2010\_H6N2  
A/black-headed\_gull/Republic\_of\_Georgia/1/2010\_H1N1  
A/black-headed\_gull/Republic\_of\_Georgia/2/2011\_H9N1  
A/quail/Lebanon/273/2010\_H5N2  
wild birds Eurasia 2010-2017  
A/duck/Shanghai/602/2009\_H10N8  
A/duck/Vietnam/LBM1/2011\_H4N6  
A/lesser\_whistling-duck/Thailand/CU-W3946/2010\_H12N1  
A/tundra\_swan/Shimane/3211A001/2011\_H5N2  
A/duck/Human/S1166/2010\_H4N6  
A/mallard/Sweden/5994/2005\_H7N7  
H5N1 Clade 2.3.2.1c  
H5N8 Eurasia 2014-2015  
A/turkey/Italy/14VIR7898-10/2014\_H5N8

Epidemiological cluster in Brescia province  
9 Oct - 21 Nov

Epidemiological cluster in the rural poultry sector  
Bergamo/Sondrio/Milan provinces  
10-24 Oct

Italy-B

Italy-A

Epidemiological cluster in Vicenza province  
26 Sep - 10 Oct

Epidemiological cluster in Mantua province  
21 July - 8 Aug

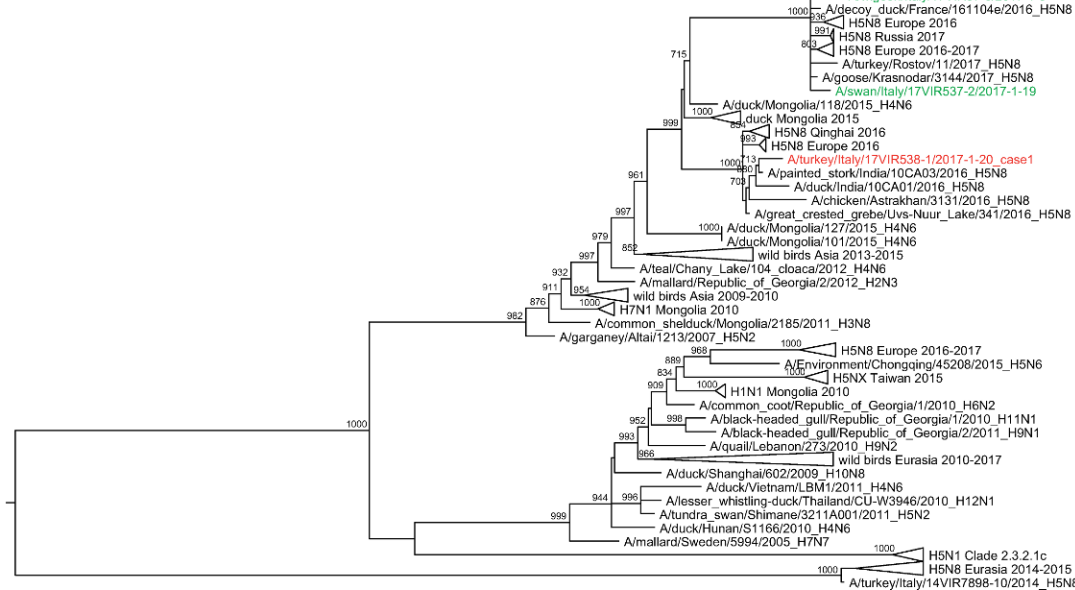

Supplementary Figure S2. Maximum Likelihood phylogenetic tree of the PB1 gene. The 2016-2017 Italian HPAI H5N8 isolated from poultry are marked in red. The 2016-2017 Italian HPAI H5N8 isolated from wild birds are marked in green. The light blue box shows the Italy A group; the violet box shows the Italy B group. Epidemiological clusters are marked with a yellow bar on the side. Bootstrap supports higher than 600/1000 are indicated next to the nodes; branch lengths are scaled according to the numbers of nucleotide substitutions per site.

# PB1

- 2016-2017 Italian HPAI H5N8 from poultry
- 2016-2017 Italian HPAI H5N8 from wild birds

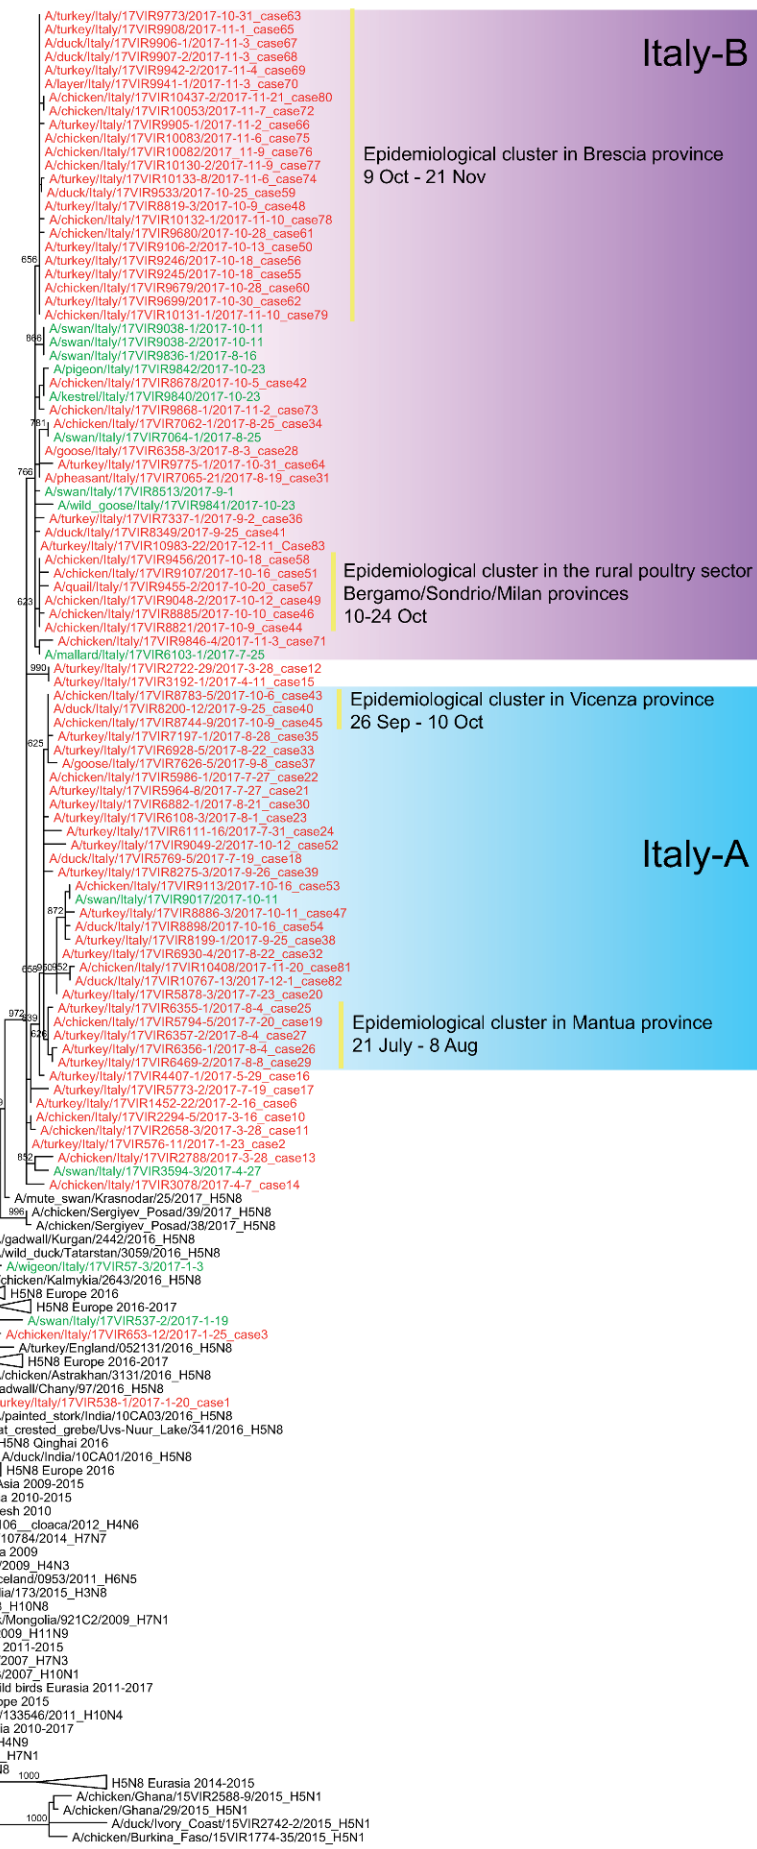

Supplementary Figure S3. Maximum Likelihood phylogenetic tree of the PA gene. The 2016-2017 Italian HPAI H5N8 isolated from poultry are marked in red. The 2016-2017 Italian HPAI H5N8 isolated from wild birds are marked in green. The light blue box shows the Italy A group; the violet box shows the Italy B group. Epidemiological clusters are marked with a yellow bar on the side. Bootstrap supports higher than 600/1000 are indicated next to the nodes; branch lengths are scaled according to the numbers of nucleotide substitutions per site.

# PA

- 2016-2017 Italian HPAI H5N8 from poultry
- 2016-2017 Italian HPAI H5N8 from wild birds

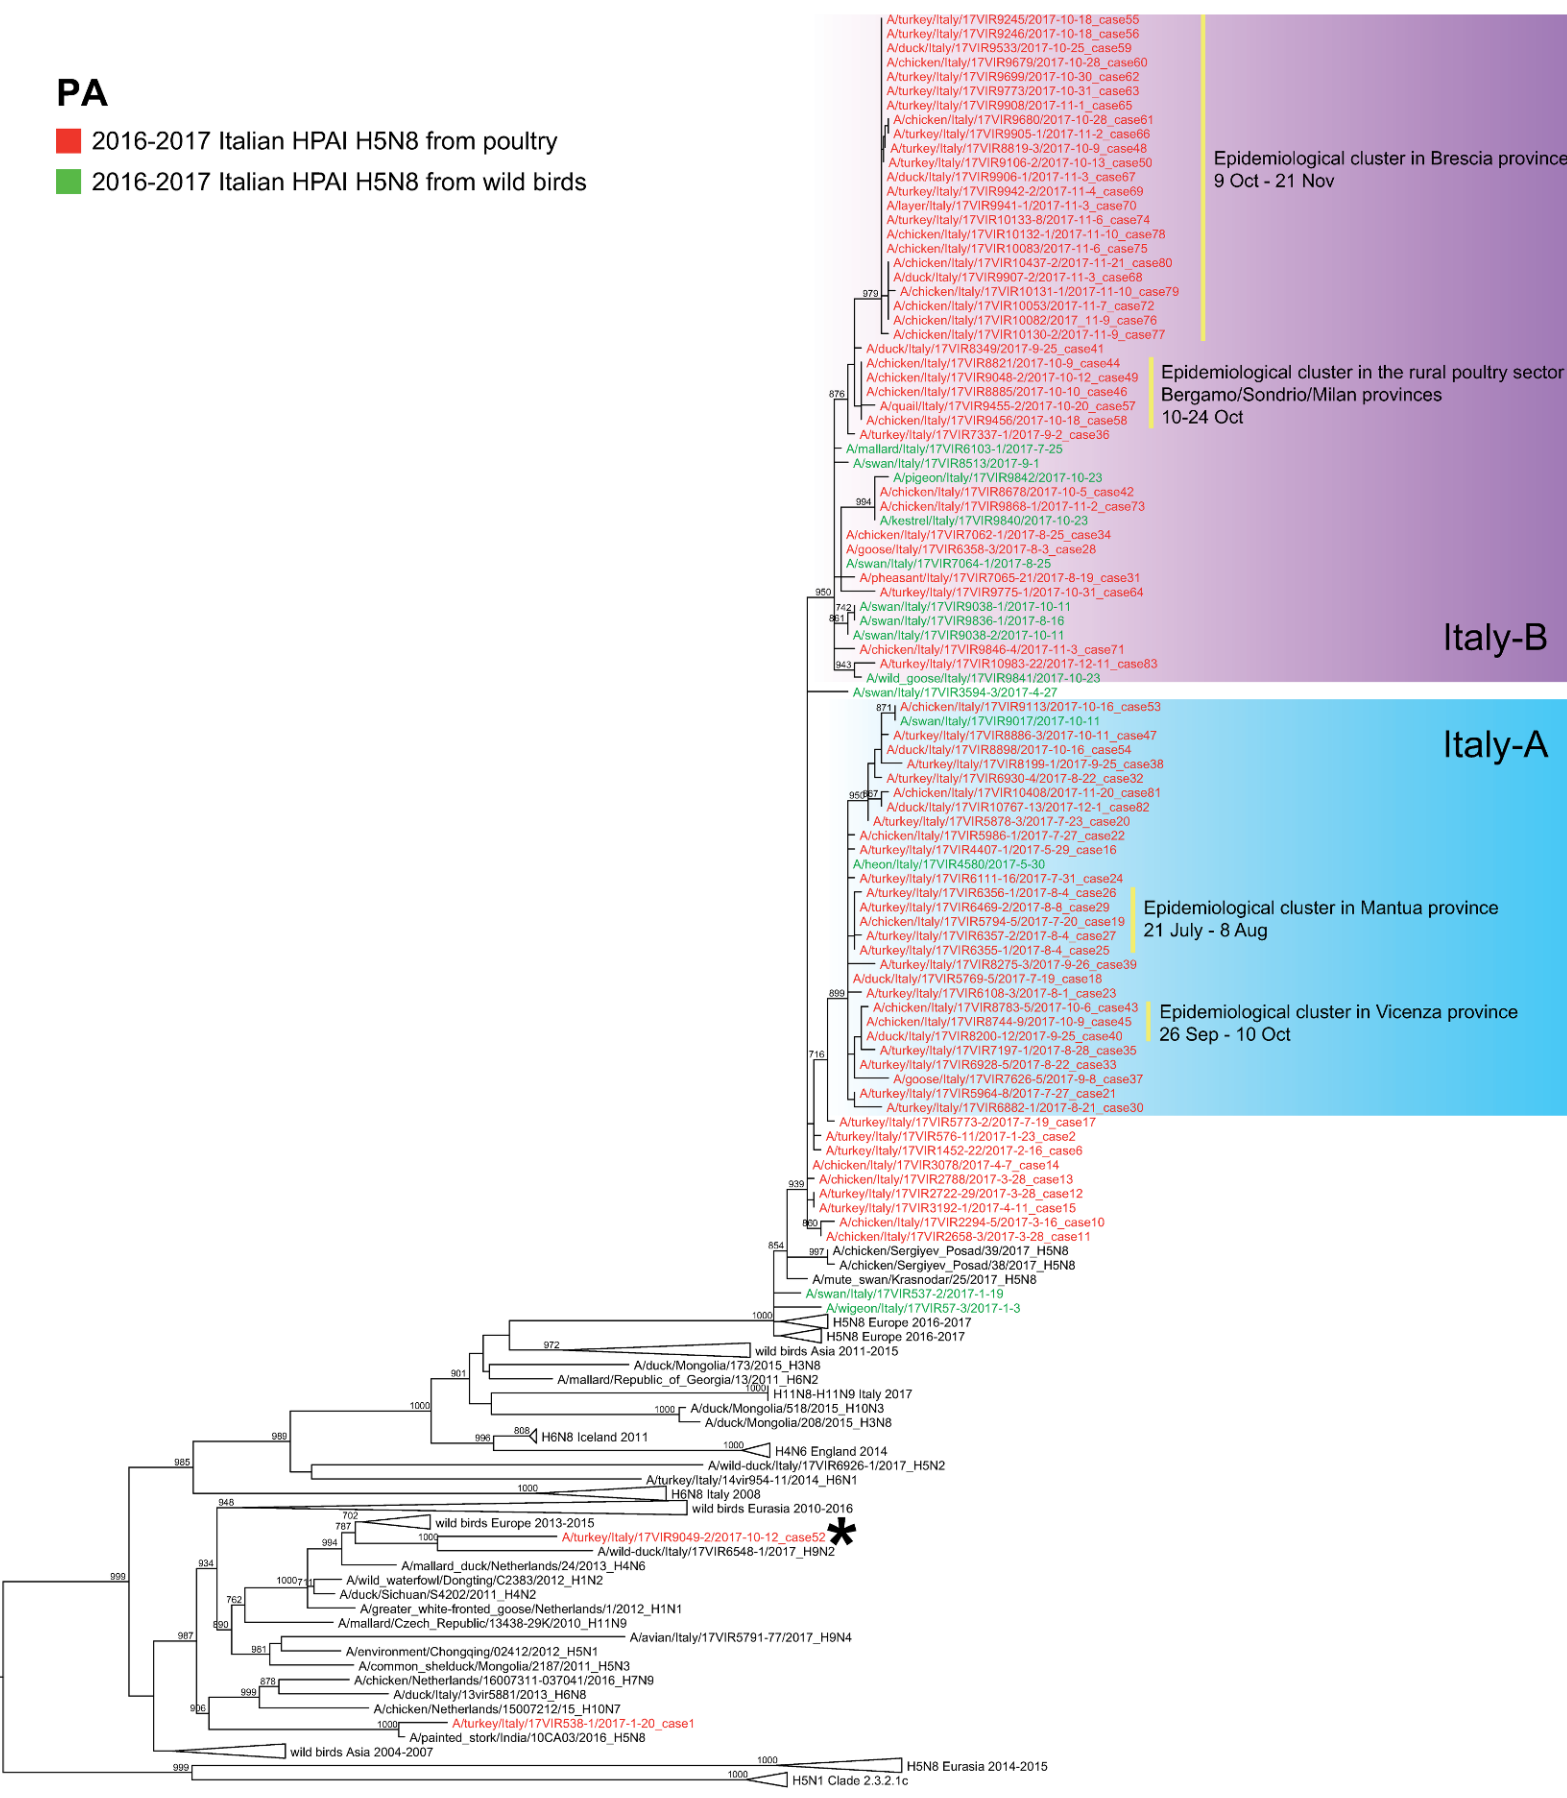

0.007



Supplementary Figure S4. Maximum Likelihood phylogenetic tree of the HA gene. The 2016-2017 Italian HPAI H5N8 isolated from poultry are marked in red. The 2016-2017 Italian HPAI H5N8 isolated from wild birds are marked in green. The light blue box shows the Italy A group; the violet box shows the Italy B group. Epidemiological clusters are marked with a yellow bar on the side. Bootstrap supports higher than 600/1000 are indicated next to the nodes; branch lengths are scaled according to the numbers of nucleotide substitutions per site.

# HA

- 2016-2017 Italian HPAI H5N8 from poultry
- 2016-2017 Italian HPAI H5N8 from wild birds

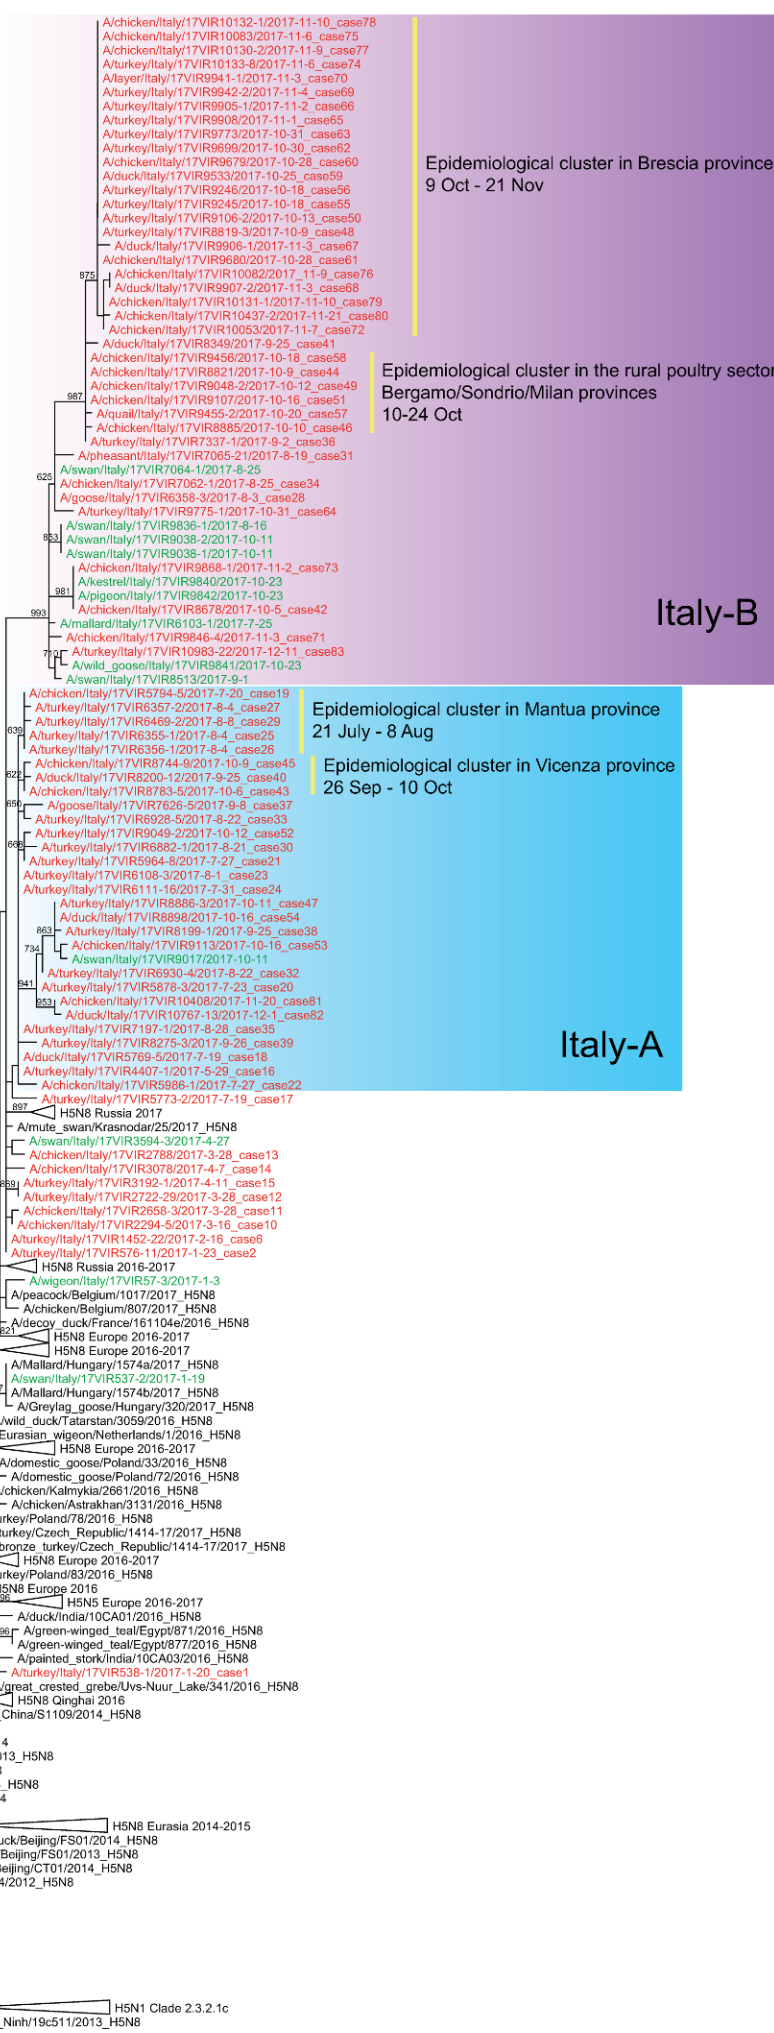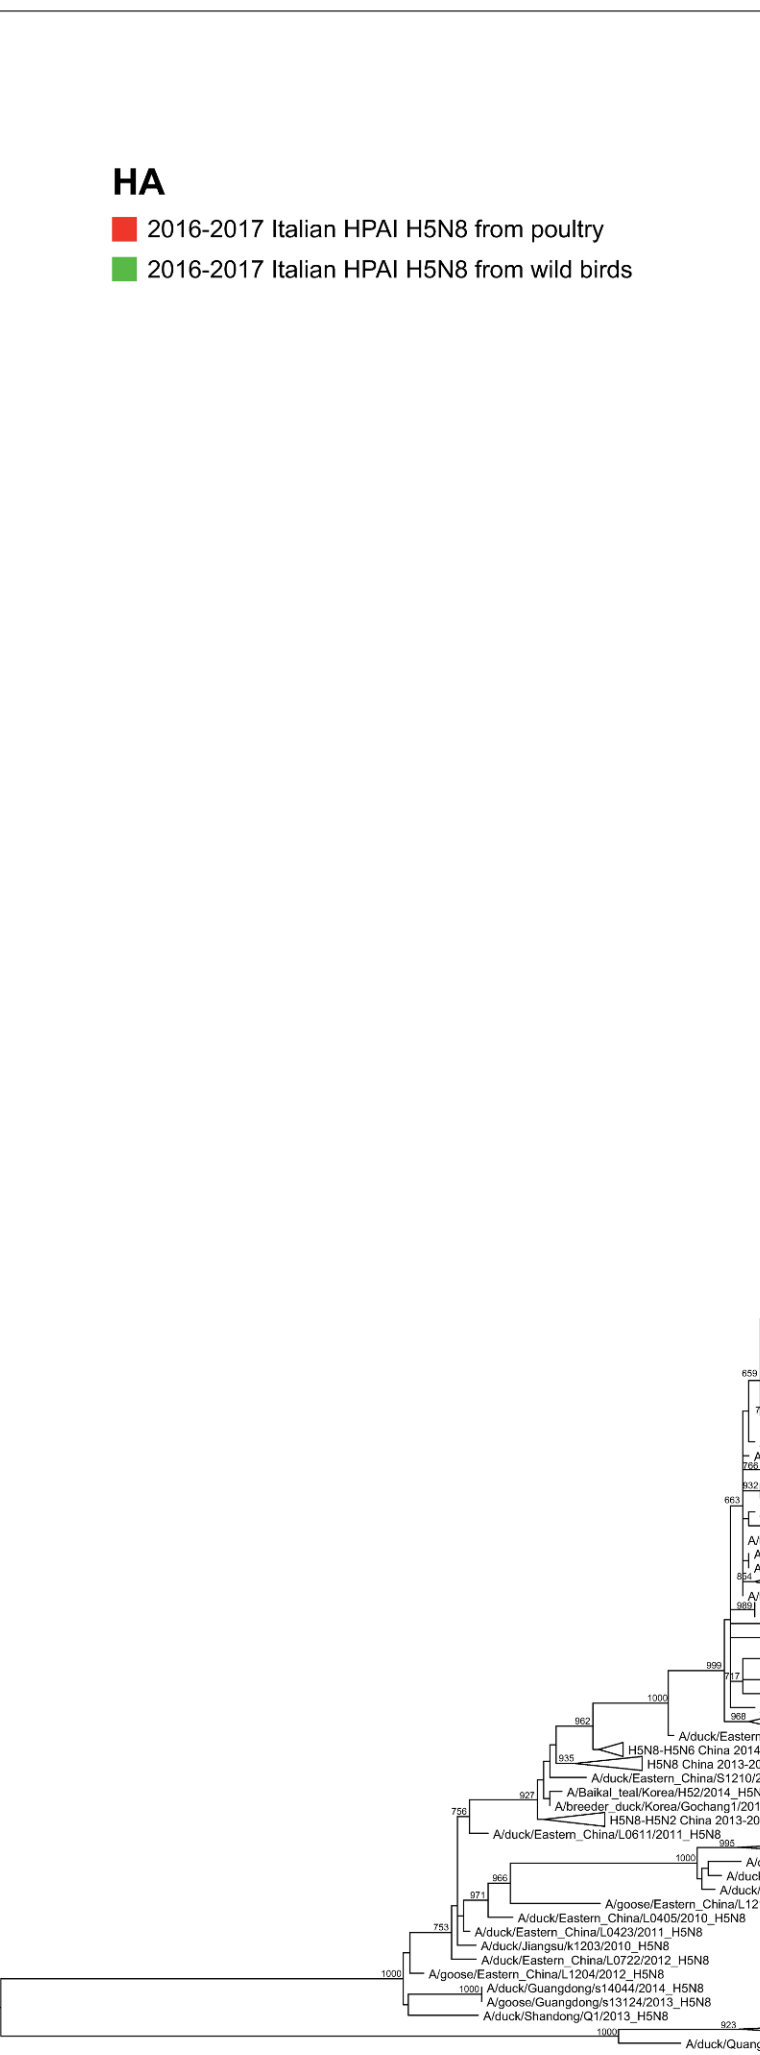

0.008

Supplementary Figure S5. Maximum Likelihood phylogenetic tree of the NP gene. The 2016-2017 Italian HPAI H5N8 isolated from poultry are marked in red. The 2016-2017 Italian HPAI H5N8 isolated from wild birds are marked in green. The light blue box shows the Italy A group; the violet box shows the Italy B group. Epidemiological clusters are marked with a yellow bar on the side. Bootstrap supports higher than 600/1000 are indicated next to the nodes; branch lengths are scaled according to the numbers of nucleotide substitutions per site.

**NP**

- 2016-2017 Italian HPAI H5N8 from poultry
- 2016-2017 Italian HPAI H5N8 from wild birds

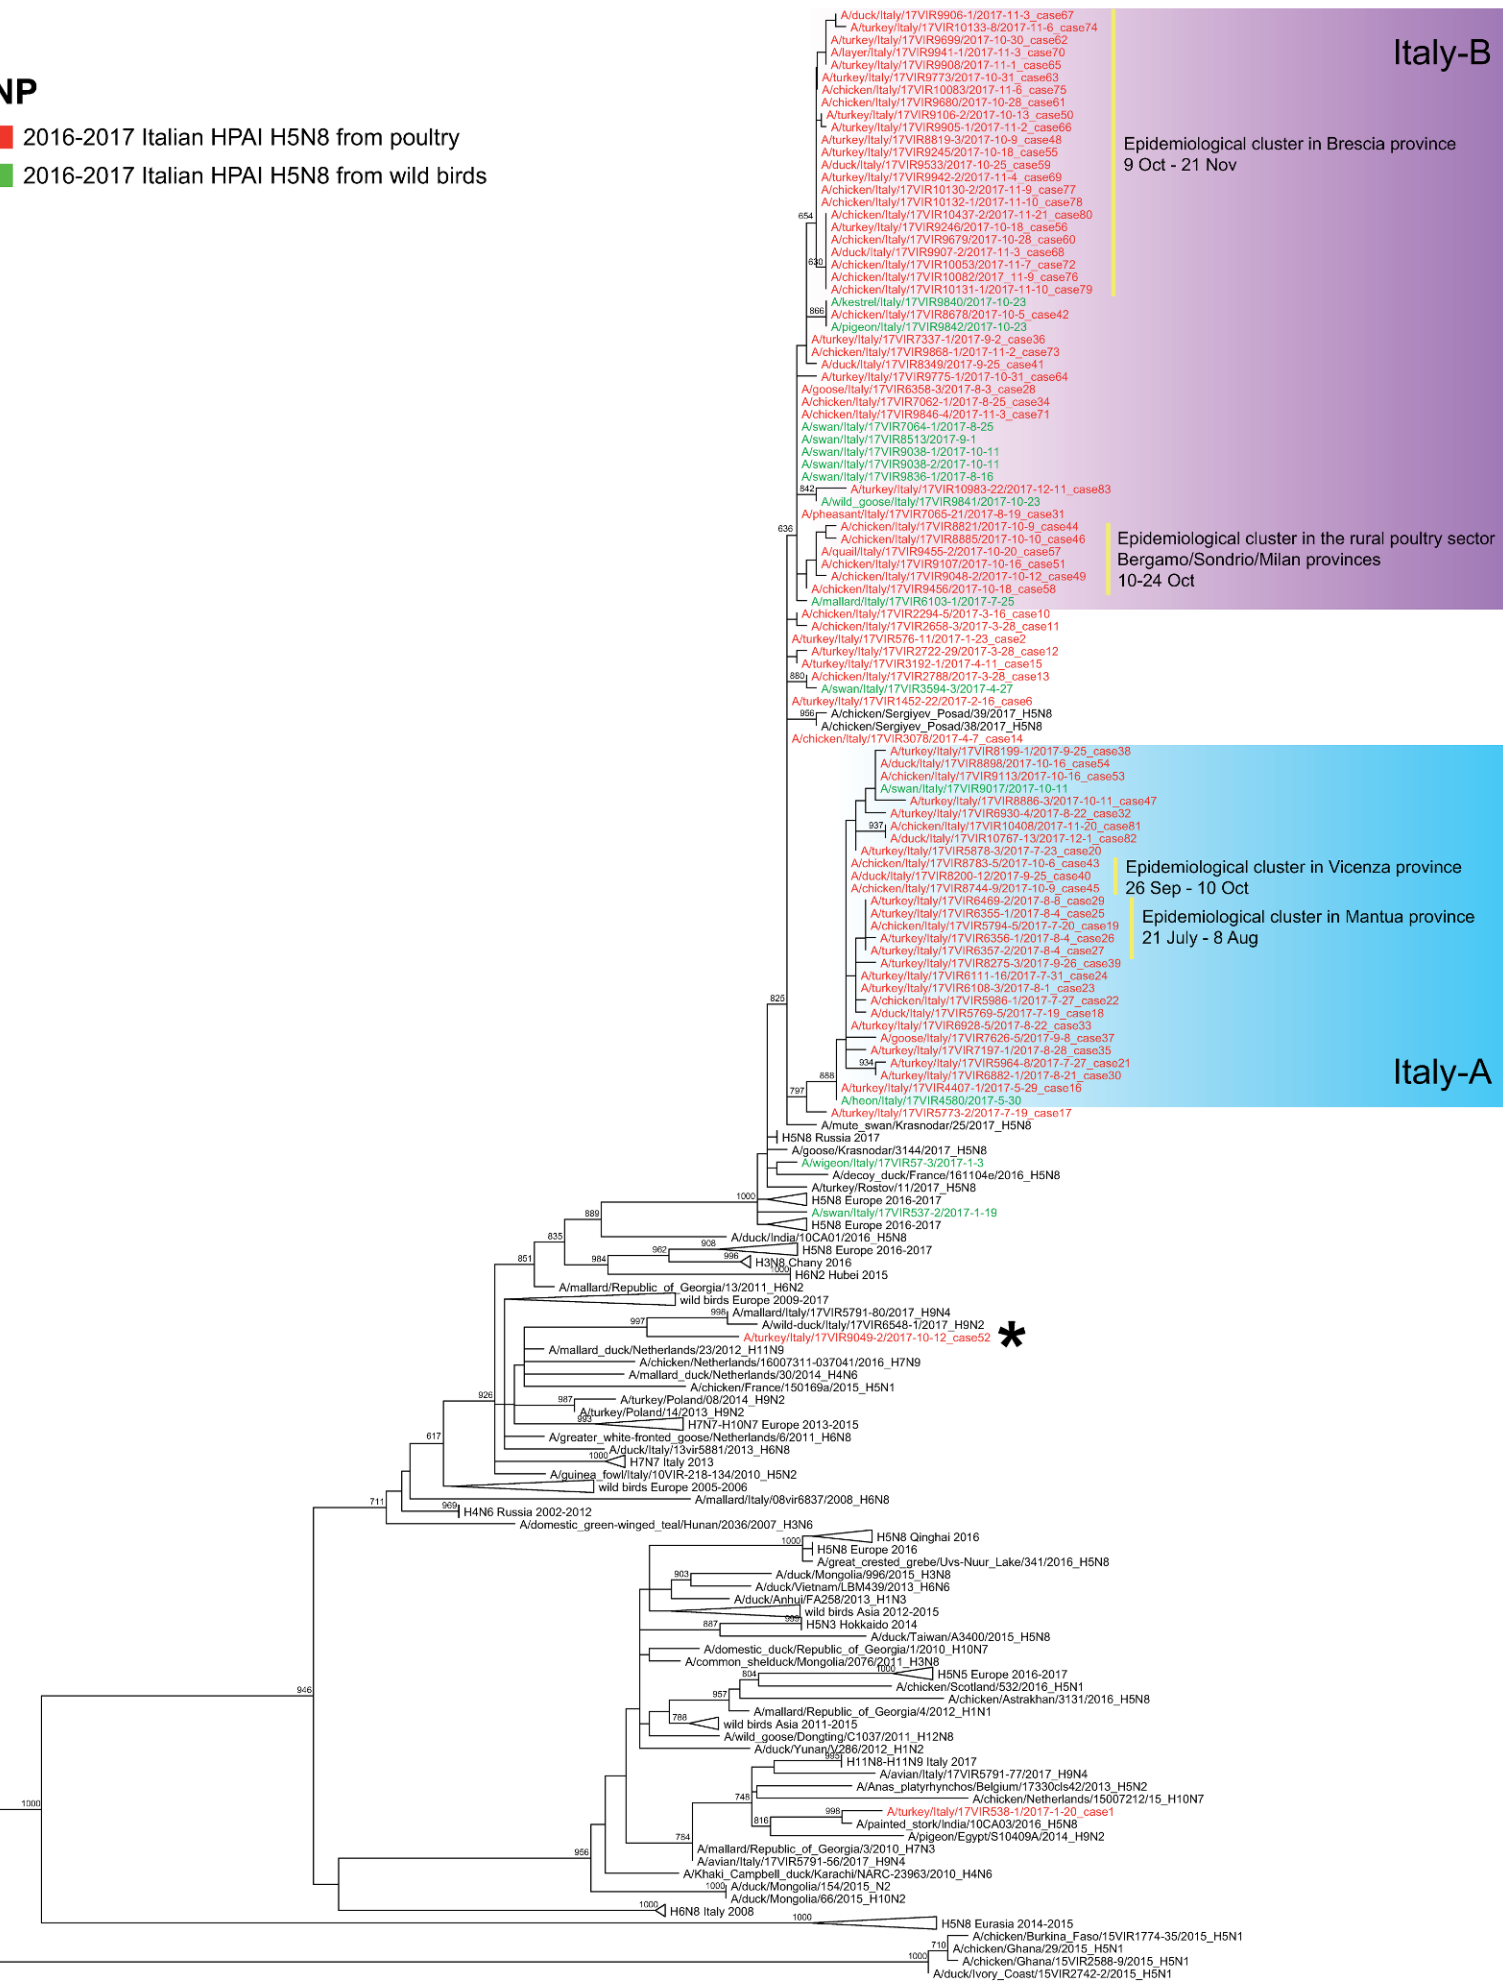

Italy-B

Epidemiological cluster in Brescia province  
9 Oct - 21 Nov

Epidemiological cluster in the rural poultry sector  
Bergamo/Sondrio/Milan provinces  
10-24 Oct

Epidemiological cluster in Vicenza province  
26 Sep - 10 Oct

Epidemiological cluster in Mantua province  
21 July - 8 Aug

Italy-A

Supplementary Figure S6. Maximum Likelihood phylogenetic tree of the NA gene. The 2016-2017 Italian HPAI H5N8 isolated from poultry are marked in red. The 2016-2017 Italian HPAI H5N8 isolated from wild birds are marked in green. The light blue box shows the Italy A group; the violet box shows the Italy B group. Epidemiological clusters are marked with a yellow bar on the side. Bootstrap supports higher than 600/1000 are indicated next to the nodes; branch lengths are scaled according to the numbers of nucleotide substitutions per site.

**NA**

- 2016-2017 Italian HPAI H5N8 from poultry
- 2016-2017 Italian HPAI H5N8 from wild birds

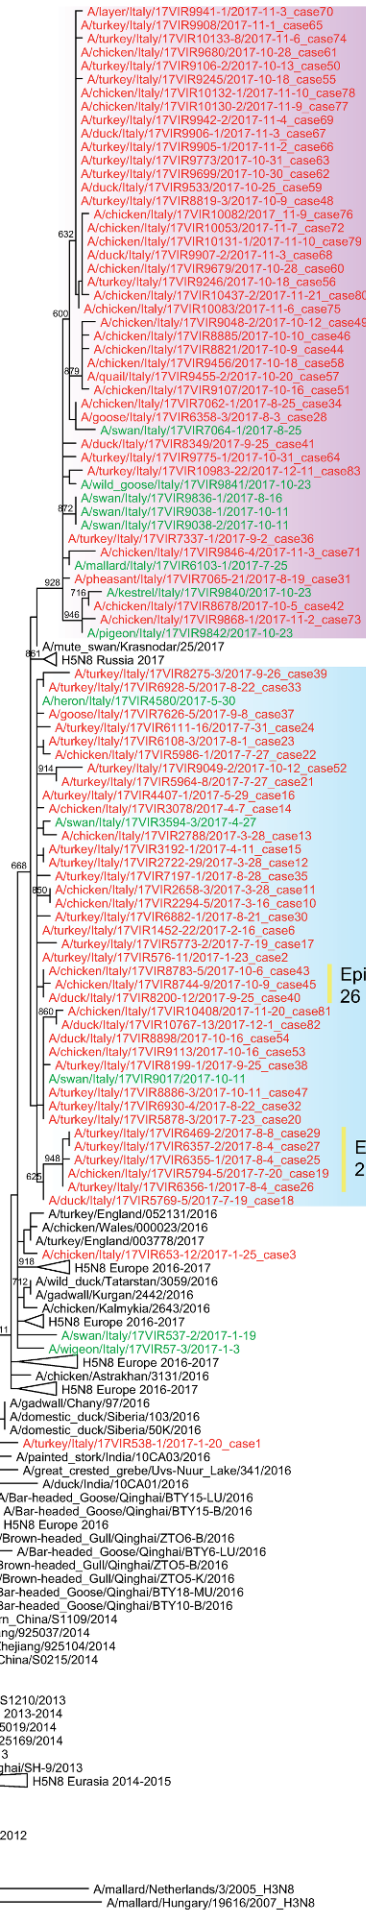

Epidemiological cluster in Brescia province  
9 Oct - 21 Nov

Epidemiological cluster in the rural poultry sector  
Bergamo/Sondrio/Milan provinces  
10-24 Oct

Italy-B

Italy-A

Epidemiological cluster in Vicenza province  
26 Sep - 10 Oct

Epidemiological cluster in Mantua province  
21 July - 8 Aug



Supplementary Figure S7. Maximum Likelihood phylogenetic tree of the MP gene. The 2016-2017 Italian HPAI H5N8 isolated from poultry are marked in red. The 2016-2017 Italian HPAI H5N8 isolated from wild birds are marked in green. The light blue box shows the Italy A group; the violet box shows the Italy B group. Epidemiological clusters are marked with a yellow bar on the side. Bootstrap supports higher than 600/1000 are indicated next to the nodes; branch lengths are scaled according to the numbers of nucleotide substitutions per site.

## MP

- 2016-2017 Italian HPAI H5N8 from poultry
- 2016-2017 Italian HPAI H5N8 from wild birds

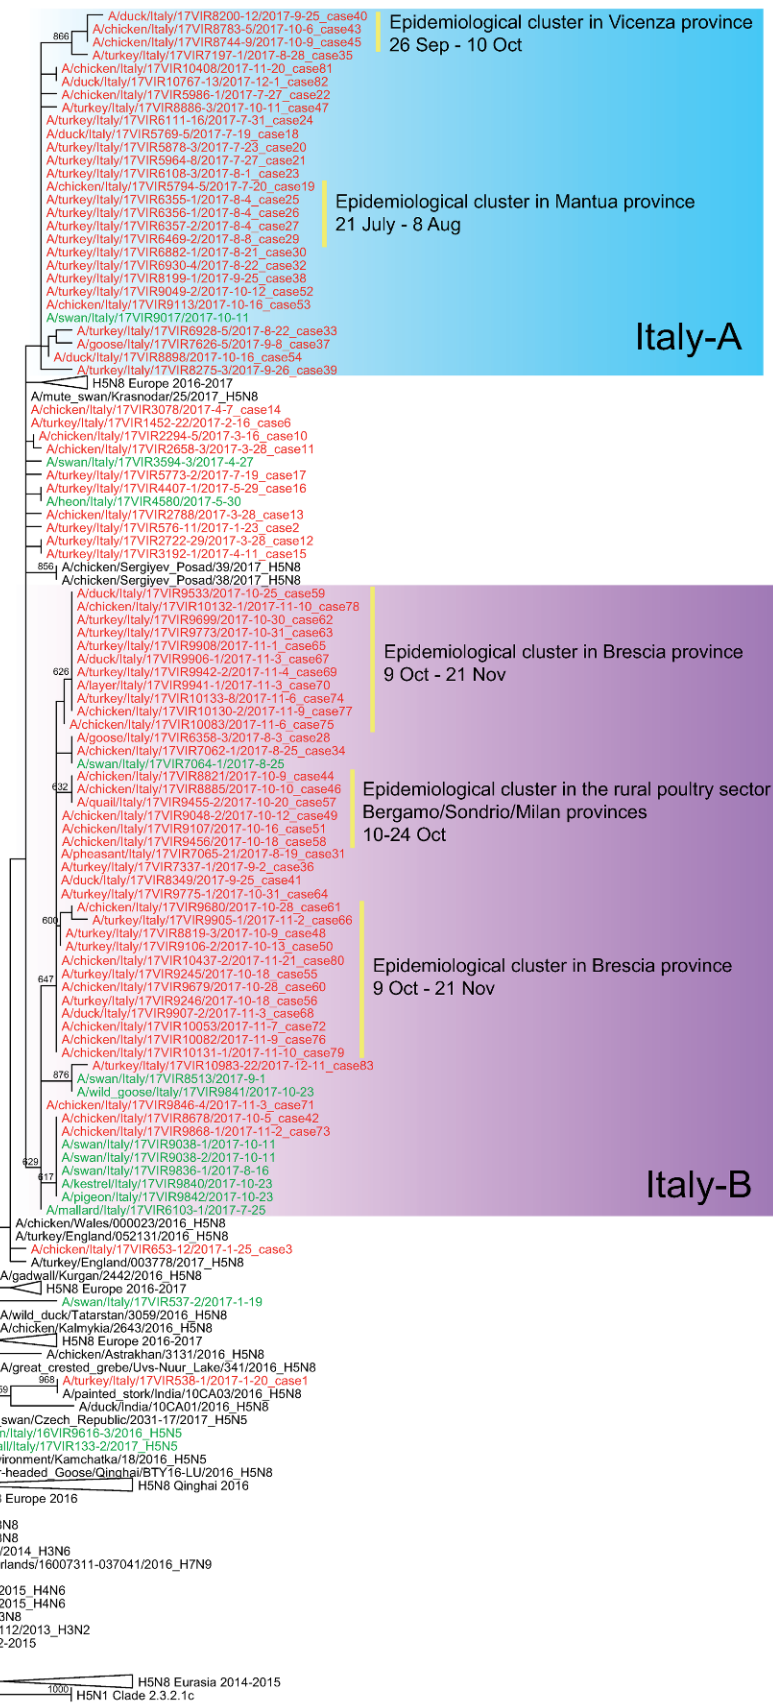

0.007

Supplementary Figure S8. Maximum Likelihood phylogenetic tree of the NS gene. The 2016-2017 Italian HPAI H5N8 isolated from poultry are marked in red. The 2016-2017 Italian HPAI H5N8 isolated from wild birds are marked in green. Epidemiological clusters are marked with a yellow bar on the side. Bootstrap supports higher than 600/1000 are indicated next to the nodes; branch lengths are scaled according to the numbers of nucleotide substitutions per site.

# NS

- 2016-2017 Italian HPAI H5N8 from poultry
- 2016-2017 Italian HPAI H5N8 from wild birds

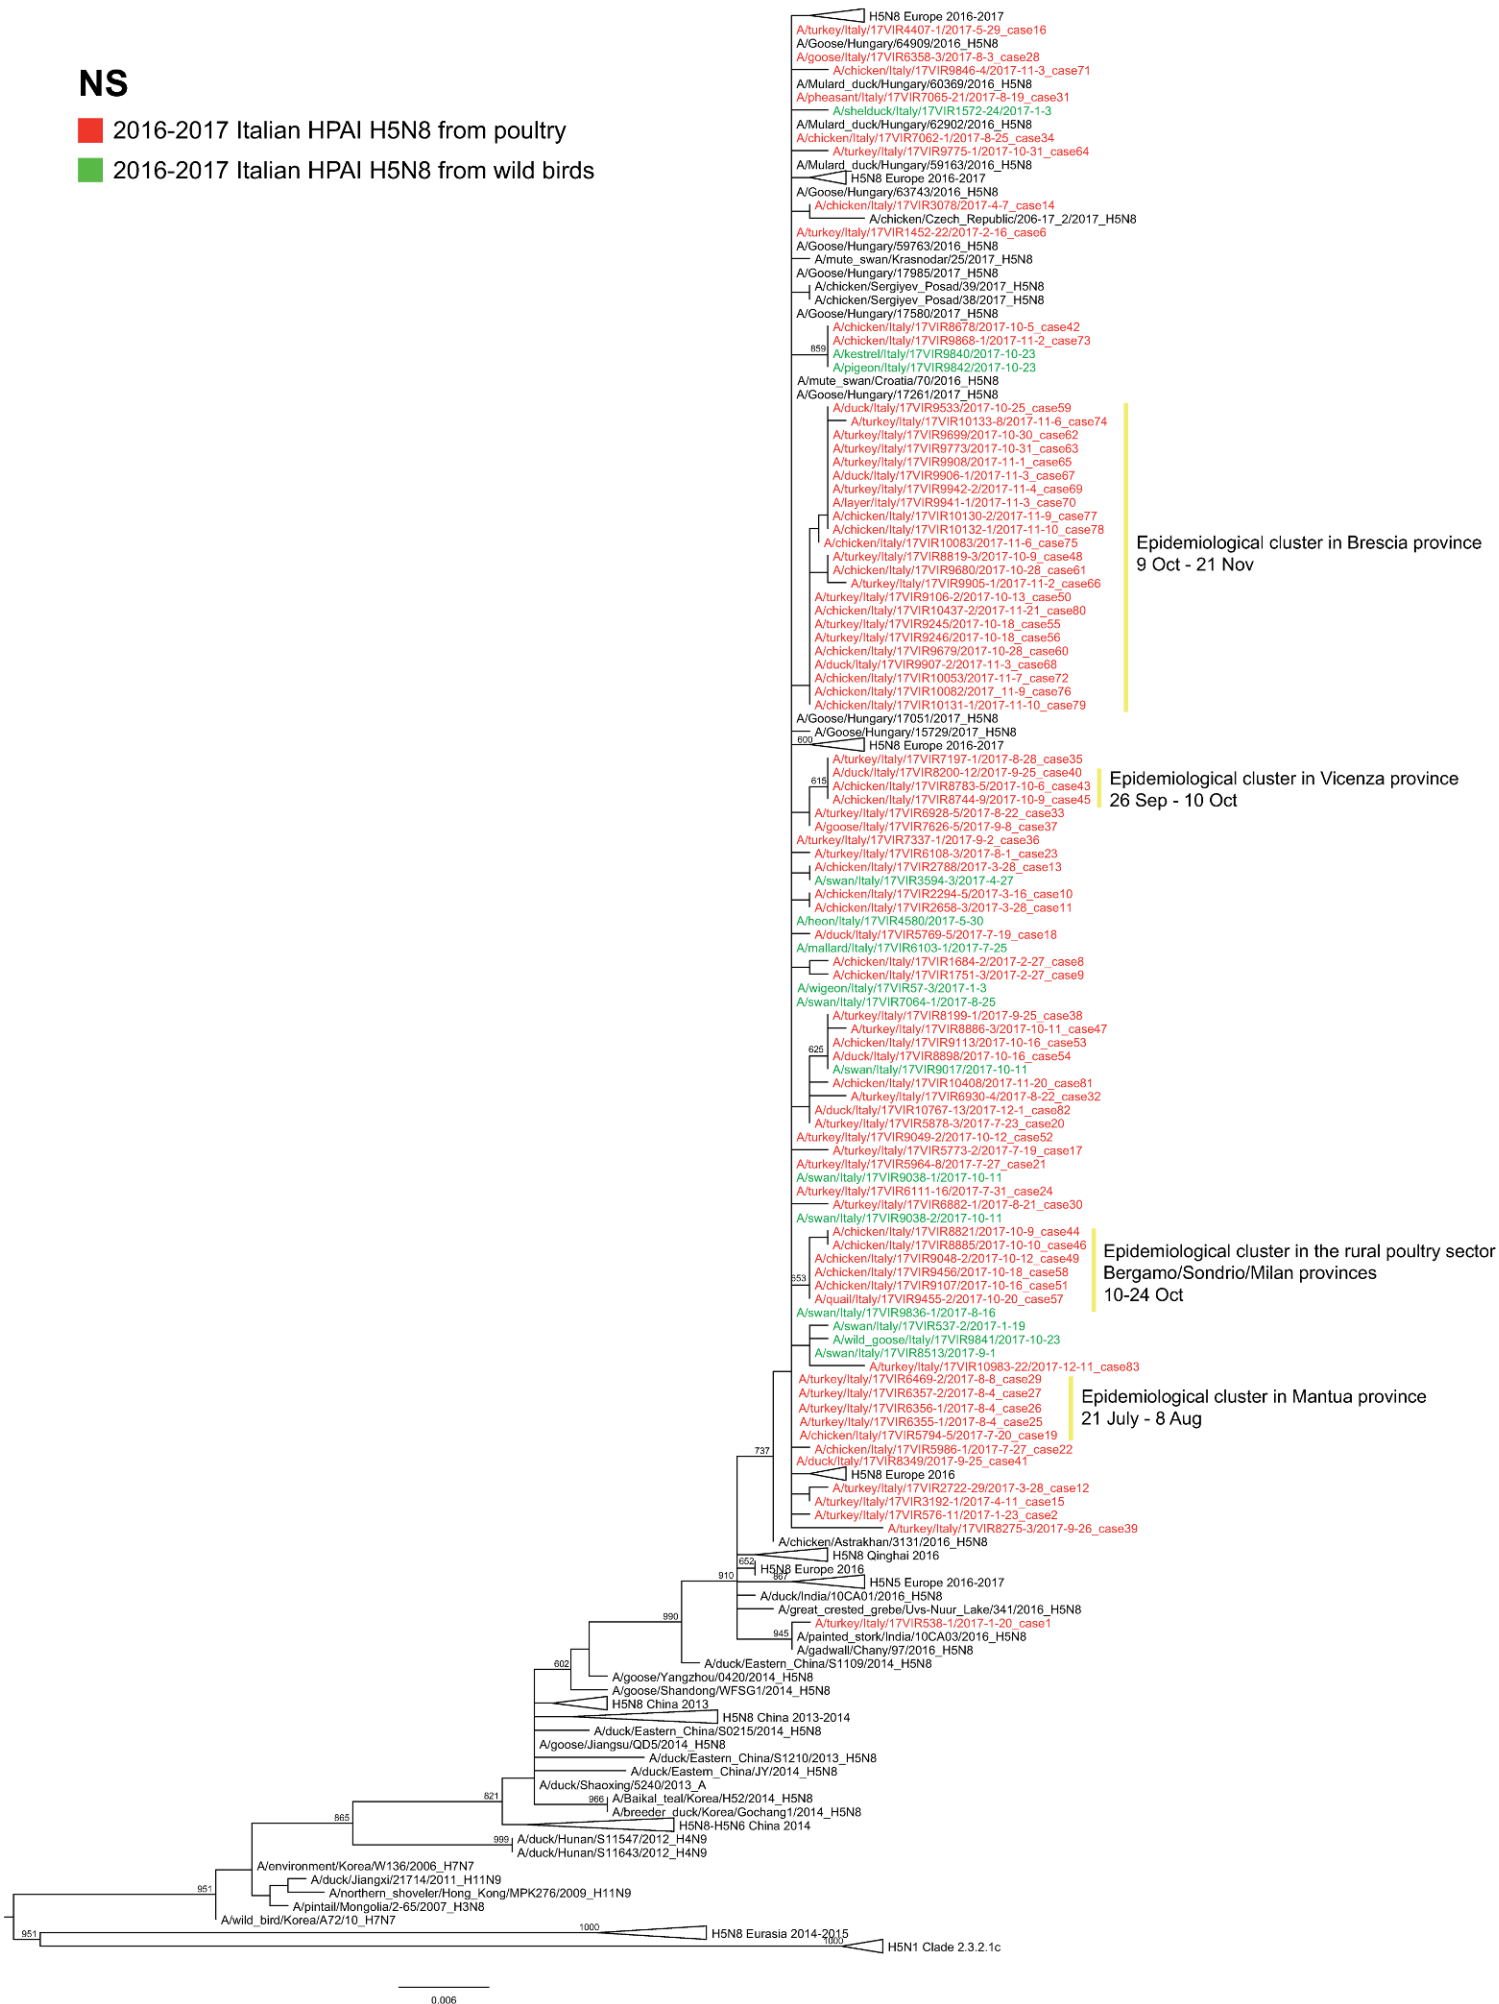



Supplementary Figure S9. H5N8 cases in domestic poultry in Italy in 2016-2017: number of sequenced viruses for each infected farm.

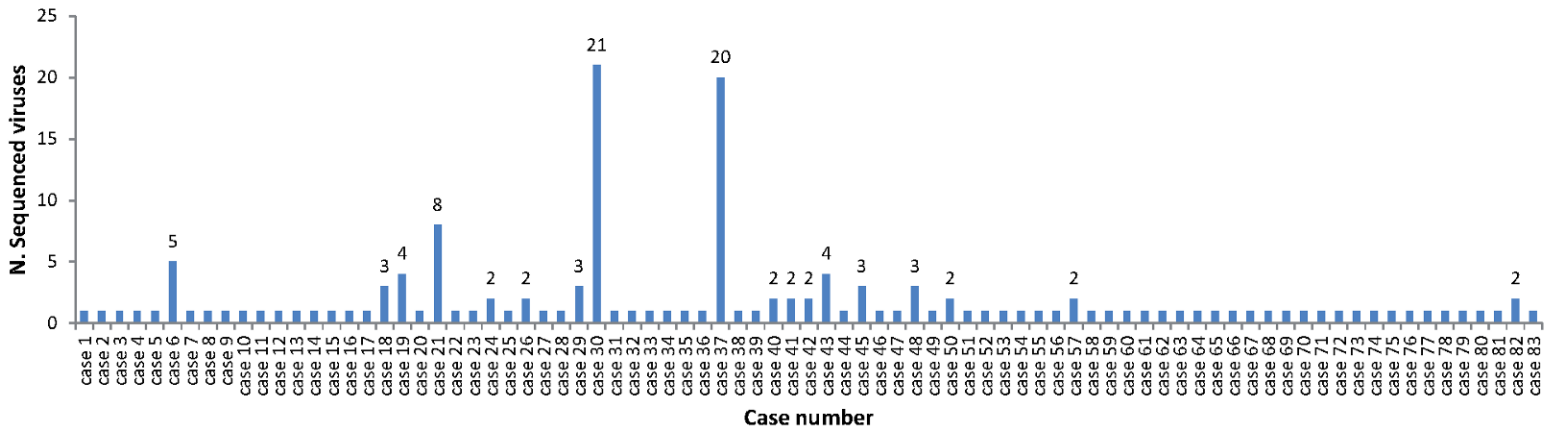

Supplementary Figure S10. Geographically explicit network of at-risk contacts; A-D, overviews of the areas where at-risk contacts between Infected Farms (IFs) were recorded.

- Contact-farms
- Infected Farms
  - First Wave
  - Second wave
- At-risk contacts
  - IF to IF
  - IF to non-IF

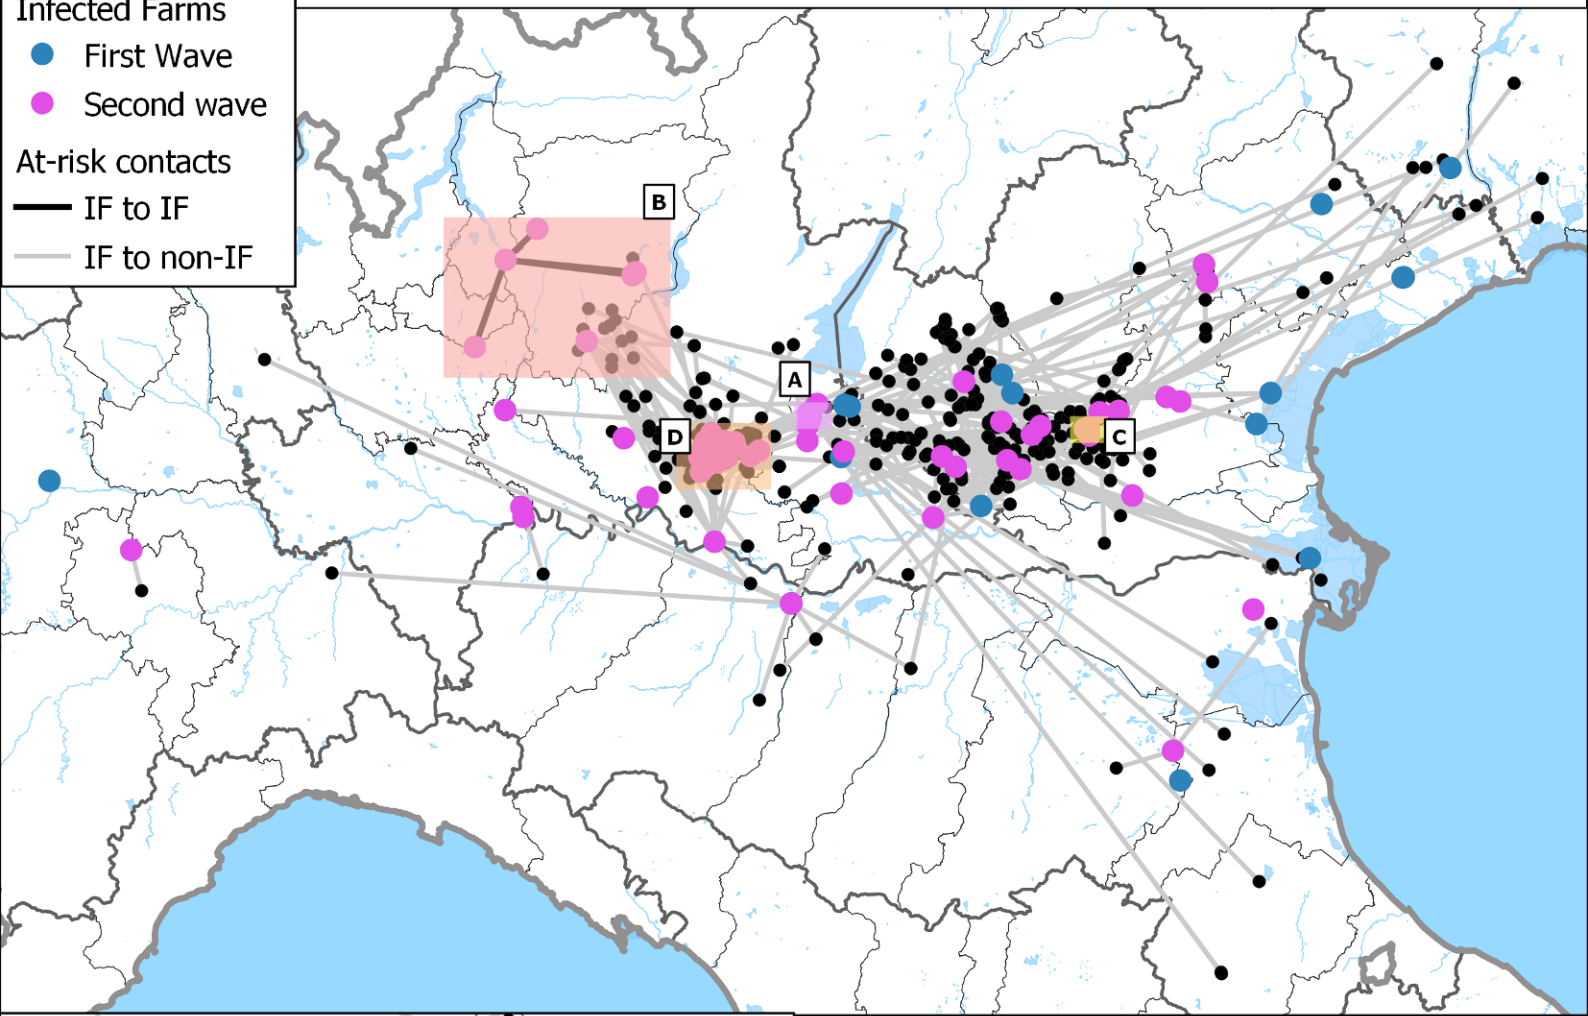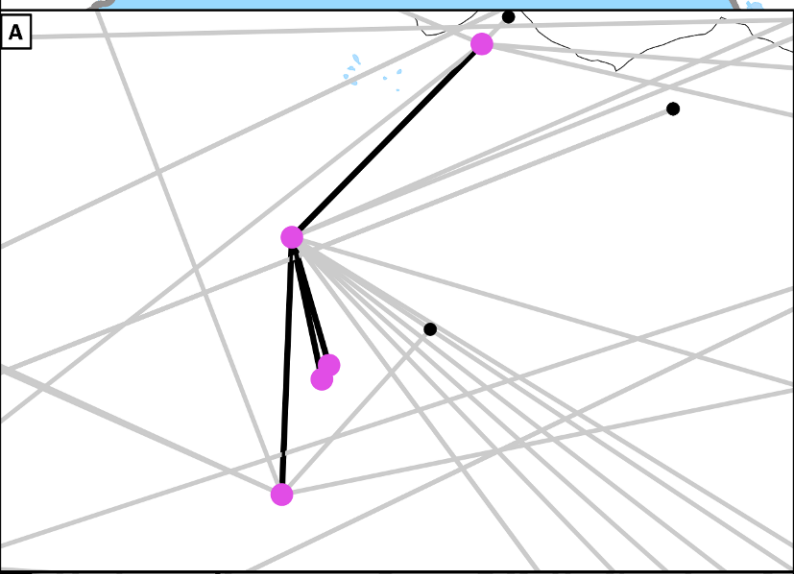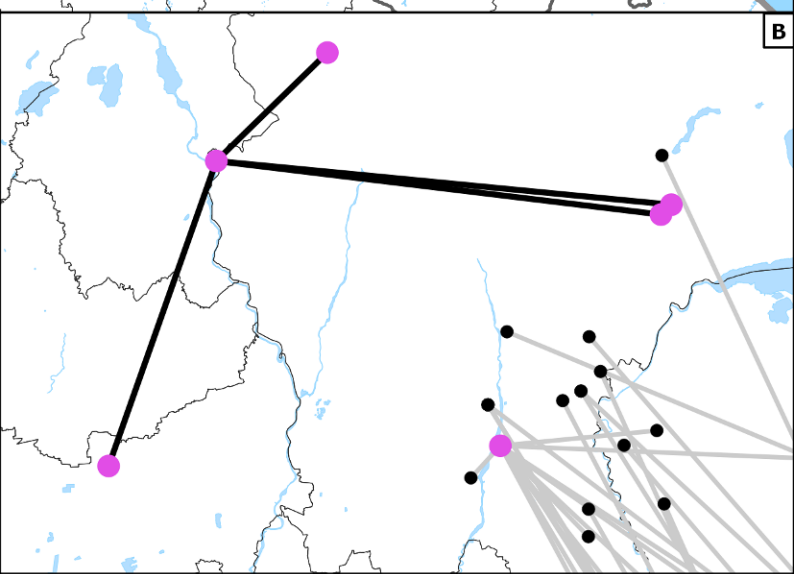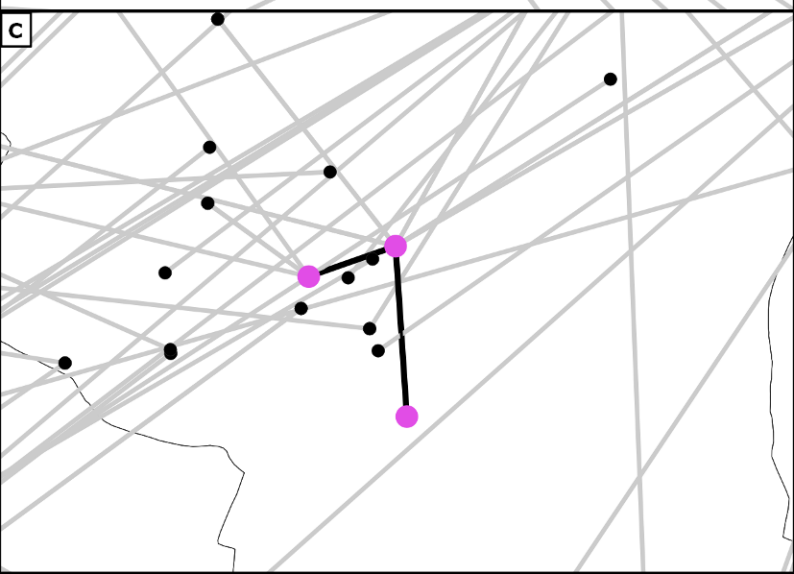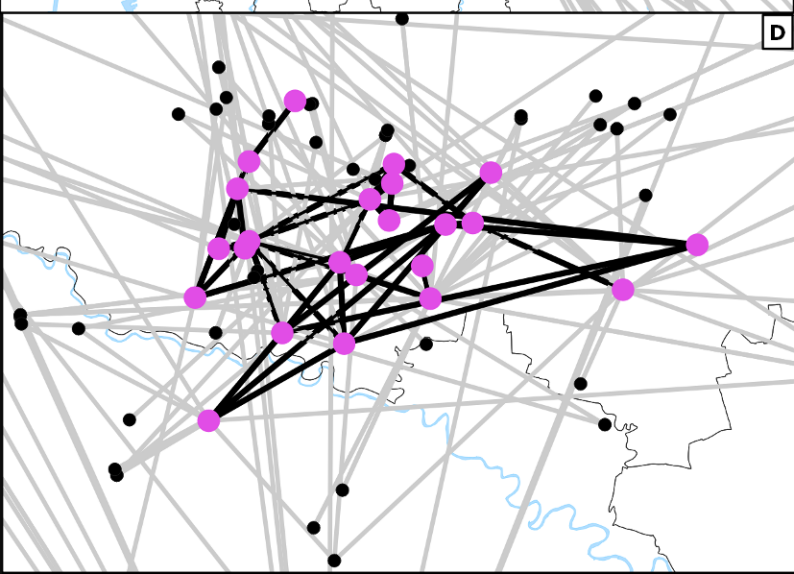

Supplementary Figure S11. Details of the Infected farm-to-Infected farm contacts in the Brescia cluster (Cluster D in figures 5 and Supplementary figure S10).

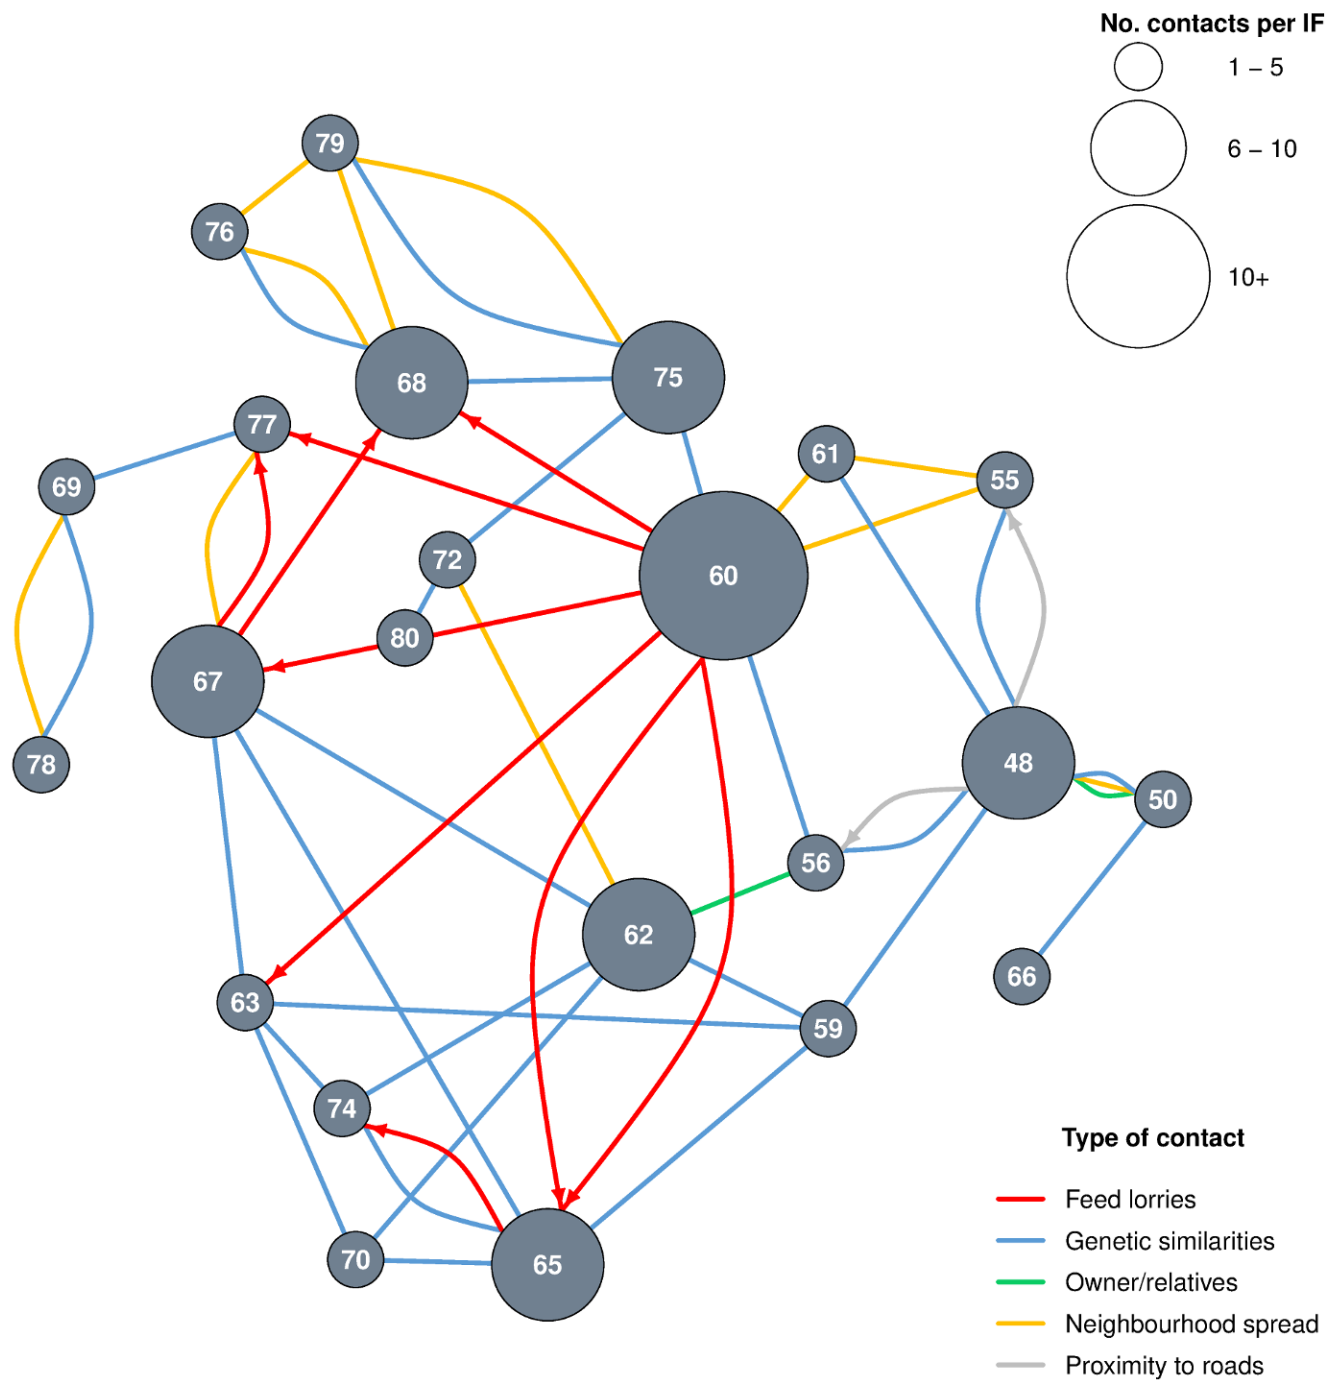

Supplementary Table S1. Main characteristics of the outbreaks in domestic poultry detected during the 2016-2017 H5N8 HPAI epidemic in Italy.

| ID | Wave | Type<br>(Primary/Secondary) | Region                | Province  | Productive Type   | Symptoms<br>Onset | Confirmation<br>Date | Extinction<br>Date |
|----|------|-----------------------------|-----------------------|-----------|-------------------|-------------------|----------------------|--------------------|
| 1  | 1    | Primary                     | Veneto                | Venice    | Fattening Turkeys | 17-Jan-2017       | 21-Jan-2017          | 26-Jan-2017        |
| 2  | 1    | Primary                     | Veneto                | Padua     | Fattening Turkeys | 23-Jan-2017       | 23-Jan-2017          | 29-Jan-2017        |
| 3  | 1    | Primary                     | Veneto                | Rovigo    | Laying Hens       | 23-Jan-2017       | 25-Jan-2017          | 4-Feb-2017         |
| 4  | 1    | Primary                     | Emilia Romagna        | Parma     | Fattening Turkeys | 1-Feb-2017        | 2-Feb-2017           | 9-Feb-2017         |
| 5  | 1    | Primary                     | Lombardy              | Mantua    | Fattening Turkeys | 13-Feb-2017       | 15-Feb-2017          | 18-Feb-2017        |
| 6  | 1    | Primary                     | Veneto                | Verona    | Fattening Turkeys | 16-Feb-2017       | 17-Feb-2017          | 21-Feb-2017        |
| 7  | 1    | Primary                     | Lombardy              | Mantua    | Fattening Turkeys | 21-Feb-2017       | 22-Feb-2017          | 25-Feb-2017        |
| 8  | 1    | Primary                     | Veneto                | Venice    | Backyard          | 27-Feb-2017       | 28-Feb-2017          | 28-Feb-2017        |
| 9  | 1    | Primary                     | Veneto                | Venice    | Backyard          | 27-Feb-2017       | 28-Feb-2017          | 1-Mar-2017         |
| 10 | 1    | Primary                     | Veneto                | Treviso   | Backyard          | 16-Mar-2017       | 16-Mar-2017          | 18-Mar-2017        |
| 11 | 1    | Primary                     | Veneto                | Verona    | Fattening Turkeys | 27-Mar-2017       | 29-Mar-2017          | 31-Mar-2017        |
| 12 | 1    | Primary                     | Friuli Venezia Giulia | Pordenone | Backyard          | 28-Mar-2017       | 28-Mar-2017          | 30-Mar-2017        |
| 13 | 1    | Primary                     | Piedmont              | Turin     | Backyard          | 20-Mar-2017       | 30-Mar-2017          | 30-Mar-2017        |
| 14 | 1    | Primary                     | Emilia Romagna        | Bologna   | Laying Hens       | 5-Apr-2017        | 8-Apr-2017           | 17-Apr-2017        |
| 15 | 1    | Primary                     | Veneto                | Verona    | Fattening Turkeys | 9-Apr-2017        | 12-Apr-2017          | 12-Apr-2017        |
| 16 | 1    | Primary                     | Lombardy              | Mantua    | Fattening Turkeys | 27-May-2017       | 30-May-2017          | 4-Jun-2017         |
| 17 | 2    | Primary                     | Lombardy              | Mantua    | Fattening Turkeys | 17-Jul-2017       | 20-Jul-2017          | 23-Jul-2017        |
| 18 | 2    | Primary                     | Lombardy              | Mantua    | Backyard          | 17-Jul-2017       | 20-Jul-2017          | 20-Jul-2017        |
| 19 | 2    | Primary                     | Lombardy              | Mantua    | Laying Hens       | 19-Jul-2017       | 21-Jul-2017          | 6-Aug-2017         |
| 20 | 2    | Primary                     | Veneto                | Verona    | Fattening Turkeys | 23-Jul-2017       | 25-Jul-2017          | 27-Jul-2017        |
| 21 | 2    | Primary                     | Veneto                | Verona    | Fattening Turkeys | 23-Jul-2017       | 27-Jul-2017          | 30-Jul-2017        |
| 22 | 2    | Primary                     | Lombardy              | Mantua    | Laying Hens       | 27-Jul-2017       | 27-Jul-2017          | 7-Aug-2017         |
| 23 | 2    | Primary                     | Veneto                | Verona    | Fattening Turkeys | 28-Jul-2017       | 2-Aug-2017           | 2-Aug-2017         |
| 24 | 2    | Primary                     | Emilia Romagna        | Parma     | Fattening Turkeys | 31-Jul-2017       | 2-Aug-2017           | 8-Aug-2017         |
| 25 | 2    | Secondary                   | Lombardy              | Mantua    | Fattening Turkeys | 4-Aug-2017        | 5-Aug-2017           | 11-Aug-2017        |
| 26 | 2    | Secondary                   | Lombardy              | Mantua    | Fattening Turkeys | 29-Jul-2017       | 5-Aug-2017           | 11-Aug-2017        |

| ID | Wave | Type<br>(Primary/Secondary) | Region         | Province | Productive Type        | Symptoms<br>Onset | Confirmation<br>Date | Extinction<br>Date |
|----|------|-----------------------------|----------------|----------|------------------------|-------------------|----------------------|--------------------|
| 27 | 2    | Secondary                   | Lombardy       | Mantua   | Fattening Turkeys      | 28-Jul-2017       | 5-Aug-2017           | 11-Aug-2017        |
| 28 | 2    | Primary                     | Lombardy       | Pavia    | Geese                  | 3-Aug-2017        | 5-Aug-2017           | 8-Aug-2017         |
| 29 | 2    | Secondary                   | Lombardy       | Mantua   | Fattening Turkeys      | 3-Aug-2017        | 9-Aug-2017           | 11-Aug-2017        |
| 30 | 2    | Primary                     | Veneto         | Verona   | Fattening Turkeys      | 19-Aug-2017       | 21-Aug-2017          | 22-Aug-2017        |
| 31 | 2    | Primary                     | Lombardy       | Lodi     | Game Birds (Pheasants) | 10-Aug-2017       | 21-Aug-2017          | 24-Aug-2017        |
| 32 | 2    | Primary                     | Veneto         | Verona   | Fattening Turkeys      | 20-Aug-2017       | 22-Aug-2017          | 23-Aug-2017        |
| 33 | 2    | Primary                     | Veneto         | Verona   | Fattening Turkeys      | 20-Aug-2017       | 23-Aug-2017          | 24-Aug-2017        |
| 34 | 2    | Primary                     | Lombardy       | Pavia    | Backyard               | 16-Aug-2017       | 25-Aug-2017          | 30-Aug-2017        |
| 35 | 2    | Primary                     | Veneto         | Verona   | Fattening Turkeys      | 27-Aug-2017       | 28-Aug-2017          | 29-Aug-2017        |
| 36 | 2    | Primary                     | Lombardy       | Cremona  | Fattening Turkeys      | 1-Sep-2017        | 2-Sep-2017           | 6-Sep-2017         |
| 37 | 2    | Primary                     | Veneto         | Padua    | Geese                  | 8-Sep-2017        | 11-Sep-2017          | 11-Sep-2017        |
| 38 | 2    | Primary                     | Veneto         | Vicenza  | Fattening Turkeys      | 20-Sep-2017       | 26-Sep-2017          | 29-Sep-2017        |
| 39 | 2    | Primary                     | Veneto         | Verona   | Fattening Turkeys      | 25-Sep-2017       | 26-Sep-2017          | 28-Sep-2017        |
| 40 | 2    | Primary                     | Veneto         | Vicenza  | Ducks                  | 24-Sep-2017       | 26-Sep-2017          | 28-Sep-2017        |
| 41 | 2    | Primary                     | Lombardy       | Cremona  | Backyard               | 15-Sep-2017       | 28-Sep-2017          | 28-Sep-2017        |
| 42 | 2    | Primary                     | Emilia Romagna | Ferrara  | Laying Hens            | 4-Oct-2017        | 5-Oct-2017           | 18-Oct-2017        |
| 43 | 2    | Secondary                   | Veneto         | Vicenza  | Chicken Broilers       | 2-Oct-2017        | 6-Oct-2017           | 9-Oct-2017         |
| 44 | 2    | Secondary                   | Lombardy       | Bergamo  | Backyard               | 9-Oct-2017        | 10-Oct-2017          | 11-Oct-2017        |
| 45 | 2    | Secondary                   | Veneto         | Vicenza  | Backyard               | 9-Oct-2017        | 10-Oct-2017          | 10-Oct-2017        |
| 46 | 2    | Primary                     | Lombardy       | Bergamo  | Grower                 | 11-Oct-2017       | 12-Oct-2017          | 12-Oct-2017        |
| 47 | 2    | Primary                     | Veneto         | Padua    | Fattening Turkeys      | 11-Oct-2017       | 11-Oct-2017          | 13-Oct-2017        |
| 48 | 2    | Primary                     | Lombardy       | Brescia  | Fattening Turkeys      | 9-Oct-2017        | 9-Oct-2017           | 11-Oct-2017        |
| 49 | 2    | Secondary                   | Lombardy       | Bergamo  | Backyard               | 12-Oct-2017       | 13-Oct-2017          | 13-Oct-2017        |
| 50 | 2    | Secondary                   | Lombardy       | Brescia  | Fattening Turkeys      | 13-Oct-2017       | 16-Oct-2017          | 16-Oct-2017        |
| 51 | 2    | Secondary                   | Lombardy       | Sondrio  | Backyard               | 12-Oct-2017       | 16-Oct-2017          | 16-Oct-2017        |
| 52 | 2    | Primary                     | Lombardy       | Mantua   | Fattening Turkeys      | 12-Oct-2017       | 13-Oct-2017          | 18-Oct-2017        |



| ID | Wave | Type<br>(Primary/Secondary) | Region   | Province | Productive Type   | Symptoms<br>Onset | Confirmation<br>Date | Extinction<br>Date |
|----|------|-----------------------------|----------|----------|-------------------|-------------------|----------------------|--------------------|
| 53 | 2    | Primary                     | Veneto   | Padua    | Backyard          | 13-Oct-2017       | 13-Oct-2017          | 16-Oct-2017        |
| 54 | 2    | Primary                     | Veneto   | Padua    | Backyard          | 13-Oct-2017       | 13-Oct-2017          | 16-Oct-2017        |
| 55 | 2    | Secondary                   | Lombardy | Brescia  | Fattening Turkeys | 18-Oct-2017       | 19-Oct-2017          | 24-Oct-2017        |
| 56 | 2    | Secondary                   | Lombardy | Brescia  | Fattening Turkeys | 18-Oct-2017       | 19-Oct-2017          | 21-Oct-2017        |
| 57 | 2    | Secondary                   | Lombardy | Bergamo  | Backyard          | 20-Oct-2017       | 24-Oct-2017          | 24-Oct-2017        |
| 58 | 2    | Primary                     | Lombardy | Milan    | Backyard          | 24-Oct-2017       | 25-Oct-2017          | 25-Oct-2017        |
| 59 | 2    | Secondary                   | Lombardy | Brescia  | Ducks             | 25-Oct-2017       | 26-Oct-2017          | 28-Oct-2017        |
| 60 | 2    | Secondary                   | Lombardy | Brescia  | Chicken Broilers  | 26-Oct-2017       | 28-Oct-2017          | 2-Nov-2017         |
| 61 | 2    | Secondary                   | Lombardy | Brescia  | Chicken Broilers  | 27-Oct-2017       | 28-Oct-2017          | 3-Nov-2017         |
| 62 | 2    | Secondary                   | Lombardy | Brescia  | Fattening Turkeys | 30-Oct-2017       | 31-Oct-2017          | 6-Nov-2017         |
| 63 | 2    | Secondary                   | Lombardy | Brescia  | Fattening Turkeys | 31-Oct-2017       | 31-Oct-2017          | 7-Nov-2017         |
| 64 | 2    | Secondary                   | Lombardy | Bergamo  | Fattening Turkeys | 31-Oct-2017       | 31-Oct-2017          | 5-Nov-2017         |
| 65 | 2    | Secondary                   | Lombardy | Brescia  | Fattening Turkeys | 1-Nov-2017        | 2-Nov-2017           | 6-Nov-2017         |
| 66 | 2    | Secondary                   | Lombardy | Brescia  | Fattening Turkeys | 1-Nov-2017        | 3-Nov-2017           | 7-Nov-2017         |
| 67 | 2    | Secondary                   | Lombardy | Brescia  | Ducks             | 26-Oct-2017       | 3-Nov-2017           | 8-Nov-2017         |
| 68 | 2    | Secondary                   | Lombardy | Brescia  | Ducks             | 1-Nov-2017        | 3-Nov-2017           | 8-Nov-2017         |
| 69 | 2    | Secondary                   | Lombardy | Brescia  | Fattening Turkeys | 2-Nov-2017        | 6-Nov-2017           | 9-Nov-2017         |
| 70 | 2    | Secondary                   | Lombardy | Brescia  | Laying Hens       | 3-Nov-2017        | 6-Nov-2017           | 13-Nov-2017        |
| 71 | 2    | Primary                     | Piedmont | Asti     | Laying Hens       | 26-Oct-2017       | 6-Nov-2017           | 10-Nov-2017        |
| 72 | 2    | Secondary                   | Lombardy | Brescia  | Chicken Breeders  | 7-Nov-2017        | 8-Nov-2017           | 13-Nov-2017        |
| 73 | 2    | Primary                     | Lazio    | Roma     | Backyard          | 2-Nov-2017        | 6-Nov-2017           | 28-Nov-2017        |
| 74 | 2    | Secondary                   | Lombardy | Cremona  | Fattening Turkeys | 8-Nov-2017        | 8-Nov-2017           | 11-Nov-2017        |
| 75 | 2    | Secondary                   | Lombardy | Brescia  | Laying Hens       | 10-Nov-2017       | 10-Nov-2017          | 16-Nov-2017        |
| 76 | 2    | Secondary                   | Lombardy | Brescia  | Laying Hens       | 9-Nov-2017        | 9-Nov-2017           | 15-Nov-2017        |
| 77 | 2    | Secondary                   | Lombardy | Brescia  | Laying Hens       | 9-Nov-2017        | 10-Nov-2017          | 14-Nov-2017        |
| 78 | 2    | Secondary                   | Lombardy | Brescia  | Chicken Broilers  | 10-Nov-2017       | 10-Nov-2017          | 14-Nov-2017        |

| ID | Wave | Type<br>(Primary/Secondary) | Region         | Province | Productive Type   | Symptoms<br>Onset | Confirmation<br>Date | Extinction<br>Date |
|----|------|-----------------------------|----------------|----------|-------------------|-------------------|----------------------|--------------------|
| 79 | 2    | Secondary                   | Lombardy       | Brescia  | Laying Hens       | 10-Nov-2017       | 10-Nov-2017          | 15-Nov-2017        |
| 80 | 2    | Secondary                   | Lombardy       | Brescia  | Chicken Broilers  | 21-Nov-2017       | 22-Nov-2017          | 25-Nov-2017        |
| 81 | 2    | Primary                     | Veneto         | Treviso  | Backyard          | 7-Nov-2017        | 23-Nov-2017          | 25-Nov-2017        |
| 82 | 2    | Primary                     | Veneto         | Treviso  | Backyard          | 30-Nov-2017       | 1-Dec-2017           | 2-Dec-2017         |
| 83 | 2    | Primary                     | Emilia Romagna | Ravenna  | Fattening Turkeys | 9-Dec-2017        | 11-Dec-2017          | 14-Dec-2017        |

Supplementary Table S2. Total number of nucleotide substitutions identified comparing the nucleotide sequences of each gene segment of the viruses collected within the same farm.

| <b>CASE</b> | <b>N. Sequences</b> | <b>PB2</b> | <b>PB1</b> | <b>PA</b> | <b>HA</b> | <b>NP</b> | <b>NA</b> | <b>M</b> | <b>NS</b> |
|-------------|---------------------|------------|------------|-----------|-----------|-----------|-----------|----------|-----------|
| <b>6</b>    | 5                   | 0          | 0          | 0         | 0         | 0         | 0         | 0        | 0         |
| <b>18</b>   | 3                   | 0          | 1          | 0         | 1         | 0         | 1         | 0        | 0         |
| <b>19</b>   | 4                   | 0          | 2          | 0         | 0         | 1         | 2         | 2        | 0         |
| <b>21</b>   | 8                   | 1          | 0          | 1         | 1         | 1         | 0         | 0        | 0         |
| <b>24</b>   | 2                   | 1          | 1          | 0         | 0         | 0         | 1         | 0        | 0         |
| <b>26</b>   | 2                   | 2          | 2          | 2         | 0         | 1         | 1         | 0        | 0         |
| <b>29</b>   | 3                   | 0          | 1          | 0         | 0         | 0         | 0         | 0        | 0         |
| <b>30</b>   | 21                  | 2          | 2          | 0         | 0         | 1         | 2         | 0        | 0         |
| <b>37</b>   | 20                  | 2          | 2          | 2         | 2         | 1         | 1         | 0        | 0         |
| <b>40</b>   | 2                   | 0          | 0          | 0         | 1         | 0         | 0         | 1        | 0         |
| <b>41</b>   | 2                   | 0          | 0          | 0         | 1         | 0         | 0         | 0        | 0         |
| <b>42</b>   | 2                   | 0          | 0          | 0         | 0         | 0         | 1         | 0        | 0         |
| <b>43</b>   | 4                   | 0          | 0          | 0         | 0         | 1         | 1         | 0        | 0         |
| <b>45</b>   | 3                   | 0          | 0          | 0         | 0         | 0         | 0         | 0        | 0         |
| <b>48</b>   | 3                   | 0          | 0          | 1         | 0         | 0         | 0         | 1        | 0         |
| <b>50</b>   | 2                   | 0          | 0          | 0         | 0         | 1         | 0         | 0        | 0         |
| <b>57</b>   | 2                   | 0          | 0          | 1         | 1         | 0         | 0         | 0        | 0         |
| <b>82</b>   | 2                   | 0          | 0          | 0         | 1         | 0         | 1         | 0        | 0         |

Supplementary Table S3. GISAID EpiFlu Database Acknowledgment table

We acknowledge the authors, originating and submitting laboratories of the sequences from GISAID's EpiFlu™ Database on which this research is based in part. The list is detailed below.

All submitters of data may be contacted directly via the GISAID website [www.gisaid.org](http://www.gisaid.org)

| Segment ID | Segment | Country | Isolate name                            | Originating Laboratory                                                                        | Submitting Laboratory                                    |
|------------|---------|---------|-----------------------------------------|-----------------------------------------------------------------------------------------------|----------------------------------------------------------|
| EPI507673  | HA      | China   | A/mallard duck/Shanghai/SH-9/2013       | Institute of Military Veterinary, Academy of Military Medical Sciences                        | Institute of Laboratory Animal Sciences, Chinese Academy |
| EPI542617  | HA      | China   | A/duck/Beijing/FS01/2013                | Institute of Microbiology, Chinese Academy of Sciences                                        | Institute of Microbiology, Chinese Academy of Sciences   |
| EPI543002  | HA      | China   | A/duck/Beijing/FS01/2014                | Institute of Microbiology, Chinese Academy of Sciences                                        | Institute of Microbiology, Chinese Academy of Sciences   |
| EPI543010  | HA      | China   | A/duck/Beijing/CT01/2014                | Institute of Microbiology, Chinese Academy of Sciences                                        | Institute of Microbiology, Chinese Academy of Sciences   |
| EPI646105  | HA      | China   | A/goose/Jiangsu/WX202/2014              | Beijing Institute of Microbiology and Epidemiology                                            | Beijing Institute of Microbiology and Epidemiology       |
| EPI675774  | HA      | China   | A/duck/Liaoning/S1001/2014              | Harbin Veterinary Research Institute (CAAS)                                                   | Harbin Veterinary Research Institute (CAAS)              |
| EPI774113  | HA      | China   | A/Bar-headed Goose/Qinghai/BTY1-B/2016  | State Key Laboratory of Virology and Wuhan Institute of Virology, Chinese Academy of Sciences | Wuhan Institute of Virology                              |
| EPI774121  | HA      | China   | A/Bar-headed Goose/Qinghai/BTY1-LV/2016 | State Key Laboratory of Virology and Wuhan Institute of Virology, Chinese Academy of Sciences | Wuhan Institute of Virology                              |
| EPI774133  | HA      | China   | A/Bar-headed Goose/Qinghai/BTY2-B/2016  | State Key Laboratory of Virology and Wuhan Institute of Virology, Chinese Academy of Sciences | Wuhan Institute of Virology                              |
| EPI774142  | HA      | China   | A/Bar-headed Goose/Qinghai/BTY2-LU/2016 | State Key Laboratory of Virology and Wuhan Institute of Virology, Chinese Academy of Sciences | Wuhan Institute of Virology                              |
| EPI774150  | HA      | China   | A/Bar-headed Goose/Qinghai/BTY3-B/2016  | State Key Laboratory of Virology and Wuhan Institute of Virology, Chinese Academy of Sciences | Wuhan Institute of Virology                              |
| EPI774159  | HA      | China   | A/Bar-headed Goose/Qinghai/BTY3-LU/2016 | State Key Laboratory of Virology and Wuhan Institute of Virology, Chinese Academy of Sciences | Wuhan Institute of Virology                              |
| EPI774168  | HA      | China   | A/Bar-headed Goose/Qinghai/BTY4-B/2016  | State Key Laboratory of Virology and Wuhan Institute of Virology, Chinese Academy of Sciences | Wuhan Institute of Virology                              |
| EPI774176  | HA      | China   | A/Bar-headed Goose/Qinghai/BTY4-LU/2016 | State Key Laboratory of Virology and Wuhan Institute of Virology, Chinese Academy of Sciences | Wuhan Institute of Virology                              |

| Segment ID | Segment | Country | Isolate name                             | Originating Laboratory                                                                        | Submitting Laboratory       |
|------------|---------|---------|------------------------------------------|-----------------------------------------------------------------------------------------------|-----------------------------|
| EPI774185  | HA      | China   | A/Bar-headed Goose/Qinghai/BTY5-B/2016   | State Key Laboratory of Virology and Wuhan Institute of Virology, Chinese Academy of Sciences | Wuhan Institute of Virology |
| EPI774193  | HA      | China   | A/Bar-headed Goose/Qinghai/BTY6-B/2016   | State Key Laboratory of Virology and Wuhan Institute of Virology, Chinese Academy of Sciences | Wuhan Institute of Virology |
| EPI774201  | HA      | China   | A/Bar-headed Goose/Qinghai/BTY6-LU/2016  | State Key Laboratory of Virology and Wuhan Institute of Virology, Chinese Academy of Sciences | Wuhan Institute of Virology |
| EPI774210  | HA      | China   | A/Bar-headed Goose/Qinghai/BTY7-B/2016   | State Key Laboratory of Virology and Wuhan Institute of Virology, Chinese Academy of Sciences | Wuhan Institute of Virology |
| EPI774218  | HA      | China   | A/Bar-headed Goose/Qinghai/BTY7-LU1/2016 | State Key Laboratory of Virology and Wuhan Institute of Virology, Chinese Academy of Sciences | Wuhan Institute of Virology |
| EPI774226  | HA      | China   | A/Bar-headed Goose/Qinghai/BTY7-LU2/2016 | State Key Laboratory of Virology and Wuhan Institute of Virology, Chinese Academy of Sciences | Wuhan Institute of Virology |
| EPI774234  | HA      | China   | A/Bar-headed Goose/Qinghai/BTY8-B/2016   | State Key Laboratory of Virology and Wuhan Institute of Virology, Chinese Academy of Sciences | Wuhan Institute of Virology |
| EPI774242  | HA      | China   | A/Bar-headed Goose/Qinghai/BTY8-LU/2016  | State Key Laboratory of Virology and Wuhan Institute of Virology, Chinese Academy of Sciences | Wuhan Institute of Virology |
| EPI774251  | HA      | China   | A/Bar-headed Goose/Qinghai/BTY9-B/2016   | State Key Laboratory of Virology and Wuhan Institute of Virology, Chinese Academy of Sciences | Wuhan Institute of Virology |
| EPI774259  | HA      | China   | A/Bar-headed Goose/Qinghai/BTY9-LU/2016  | State Key Laboratory of Virology and Wuhan Institute of Virology, Chinese Academy of Sciences | Wuhan Institute of Virology |
| EPI774267  | HA      | China   | A/Bar-headed Goose/Qinghai/BTY10-B/2016  | State Key Laboratory of Virology and Wuhan Institute of Virology, Chinese Academy of Sciences | Wuhan Institute of Virology |
| EPI774277  | HA      | China   | A/Bar-headed Goose/Qinghai/BTY10-LU/2016 | State Key Laboratory of Virology and Wuhan Institute of Virology, Chinese Academy of Sciences | Wuhan Institute of Virology |
| EPI774286  | HA      | China   | A/Bar-headed Goose/Qinghai/BTY11-B/2016  | State Key Laboratory of Virology and Wuhan Institute of Virology, Chinese Academy of Sciences | Wuhan Institute of Virology |
| EPI774294  | HA      | China   | A/Bar-headed Goose/Qinghai/BTY11-LU/2016 | State Key Laboratory of Virology and Wuhan Institute of Virology, Chinese Academy of Sciences | Wuhan Institute of Virology |
| EPI774302  | HA      | China   | A/Bar-headed Goose/Qinghai/BTY12-B/2016  | State Key Laboratory of Virology and Wuhan Institute of Virology, Chinese Academy of Sciences | Wuhan Institute of Virology |



| Segment ID | Segment | Country | Isolate name                             | Originating Laboratory                                                                        | Submitting Laboratory       |
|------------|---------|---------|------------------------------------------|-----------------------------------------------------------------------------------------------|-----------------------------|
| EPI774310  | HA      | China   | A/Bar-headed Goose/Qinghai/BTY12-LU/2016 | State Key Laboratory of Virology and Wuhan Institute of Virology, Chinese Academy of Sciences | Wuhan Institute of Virology |
| EPI774318  | HA      | China   | A/Bar-headed Goose/Qinghai/BTY13-B/2016  | State Key Laboratory of Virology and Wuhan Institute of Virology, Chinese Academy of Sciences | Wuhan Institute of Virology |
| EPI774326  | HA      | China   | A/Bar-headed Goose/Qinghai/BTY13-LU/2016 | State Key Laboratory of Virology and Wuhan Institute of Virology, Chinese Academy of Sciences | Wuhan Institute of Virology |
| EPI774335  | HA      | China   | A/Bar-headed Goose/Qinghai/BTY14-B/2016  | State Key Laboratory of Virology and Wuhan Institute of Virology, Chinese Academy of Sciences | Wuhan Institute of Virology |
| EPI774344  | HA      | China   | A/Bar-headed Goose/Qinghai/BTY14-LU/2016 | State Key Laboratory of Virology and Wuhan Institute of Virology, Chinese Academy of Sciences | Wuhan Institute of Virology |
| EPI774352  | HA      | China   | A/Bar-headed Goose/Qinghai/BTY15-B/2016  | State Key Laboratory of Virology and Wuhan Institute of Virology, Chinese Academy of Sciences | Wuhan Institute of Virology |
| EPI774361  | HA      | China   | A/Bar-headed Goose/Qinghai/BTY15-LU/2016 | State Key Laboratory of Virology and Wuhan Institute of Virology, Chinese Academy of Sciences | Wuhan Institute of Virology |
| EPI774369  | HA      | China   | A/Bar-headed Goose/Qinghai/BTY16-B/2016  | State Key Laboratory of Virology and Wuhan Institute of Virology, Chinese Academy of Sciences | Wuhan Institute of Virology |
| EPI774378  | HA      | China   | A/Bar-headed Goose/Qinghai/BTY16-LU/2016 | State Key Laboratory of Virology and Wuhan Institute of Virology, Chinese Academy of Sciences | Wuhan Institute of Virology |
| EPI774386  | HA      | China   | A/Bar-headed Goose/Qinghai/BTY17-B/2016  | State Key Laboratory of Virology and Wuhan Institute of Virology, Chinese Academy of Sciences | Wuhan Institute of Virology |
| EPI774394  | HA      | China   | A/Bar-headed Goose/Qinghai/BTY17-LU/2016 | State Key Laboratory of Virology and Wuhan Institute of Virology, Chinese Academy of Sciences | Wuhan Institute of Virology |
| EPI774402  | HA      | China   | A/Bar-headed Goose/Qinghai/BTY18-B/2016  | State Key Laboratory of Virology and Wuhan Institute of Virology, Chinese Academy of Sciences | Wuhan Institute of Virology |
| EPI774410  | HA      | China   | A/Bar-headed Goose/Qinghai/BTY18-LU/2016 | State Key Laboratory of Virology and Wuhan Institute of Virology, Chinese Academy of Sciences | Wuhan Institute of Virology |
| EPI774426  | HA      | China   | A/Brown-headed Gull/Qinghai/ZTO1-B/2016  | State Key Laboratory of Virology and Wuhan Institute of Virology, Chinese Academy of Sciences | Wuhan Institute of Virology |
| EPI774434  | HA      | China   | A/Brown-headed Gull/Qinghai/ZTO1-LU/2016 | State Key Laboratory of Virology and Wuhan Institute of Virology, Chinese Academy of Sciences | Wuhan Institute of Virology |

| Segment ID | Segment | Country | Isolate name                                 | Originating Laboratory                                                                        | Submitting Laboratory         |
|------------|---------|---------|----------------------------------------------|-----------------------------------------------------------------------------------------------|-------------------------------|
| EPI774442  | HA      | China   | A/Brown-headed Gull/Qinghai/ZTO3-B/2016      | State Key Laboratory of Virology and Wuhan Institute of Virology, Chinese Academy of Sciences | Wuhan Institute of Virology   |
| EPI774450  | HA      | China   | A/Brown-headed Gull/Qinghai/ZTO3-LU/2016     | State Key Laboratory of Virology and Wuhan Institute of Virology, Chinese Academy of Sciences | Wuhan Institute of Virology   |
| EPI774458  | HA      | China   | A/Brown-headed Gull/Qinghai/ZTO4-B/2016      | State Key Laboratory of Virology and Wuhan Institute of Virology, Chinese Academy of Sciences | Wuhan Institute of Virology   |
| EPI774466  | HA      | China   | A/Brown-headed Gull/Qinghai/ZTO5-B/2016      | State Key Laboratory of Virology and Wuhan Institute of Virology, Chinese Academy of Sciences | Wuhan Institute of Virology   |
| EPI774475  | HA      | China   | A/Brown-headed Gull/Qinghai/ZTO5-K/2016      | State Key Laboratory of Virology and Wuhan Institute of Virology, Chinese Academy of Sciences | Wuhan Institute of Virology   |
| EPI774483  | HA      | China   | A/Brown-headed Gull/Qinghai/ZTO6-B/2016      | State Key Laboratory of Virology and Wuhan Institute of Virology, Chinese Academy of Sciences | Wuhan Institute of Virology   |
| EPI774490  | HA      | China   | A/Brown-headed Gull/Qinghai/ZTO6-SP/2016     | State Key Laboratory of Virology and Wuhan Institute of Virology, Chinese Academy of Sciences | Wuhan Institute of Virology   |
| EPI774498  | HA      | China   | A/Brown-headed Gull/Qinghai/ZTO6-MU/2016     | State Key Laboratory of Virology and Wuhan Institute of Virology, Chinese Academy of Sciences | Wuhan Institute of Virology   |
| EPI774506  | HA      | China   | A/Great Black-headed Gull/Qinghai/YO1-B/2016 | State Key Laboratory of Virology and Wuhan Institute of Virology, Chinese Academy of Sciences | Wuhan Institute of Virology   |
| EPI861568  | HA      | Croatia | A/mute swan/Croatia/70/2016                  | NA                                                                                            | Croatian Veterinary Institute |
| EPI861572  | HA      | Croatia | A/mute swan/Croatia/78/2016                  | NA                                                                                            | Croatian Veterinary Institute |
| EPI864746  | HA      | Croatia | A/mute swan/Croatia/85/2016                  | NA                                                                                            | Croatian Veterinary Institute |
| EPI873212  | HA      | Croatia | A/chicken/Croatia/103/2016                   | NA                                                                                            | Croatian Veterinary Institute |
| EPI873624  | HA      | Croatia | A/mute swan/Croatia/9/2017                   | NA                                                                                            | Croatian Veterinary Institute |
| EPI873626  | HA      | Croatia | A/mute swan/Croatia/104/2016                 | NA                                                                                            | Croatian Veterinary Institute |

| Segment ID | Segment | Country        | Isolate name                                    | Originating Laboratory            | Submitting Laboratory             |
|------------|---------|----------------|-------------------------------------------------|-----------------------------------|-----------------------------------|
| EPI881899  | HA      | Croatia        | A/breeder duck/Croatia/21/2017                  | NA                                | Croatian Veterinary Institute     |
| EPI881901  | HA      | Croatia        | A/mute swan/Croatia/15/2017                     | NA                                | Croatian Veterinary Institute     |
| EPI891667  | HA      | Croatia        | A/mute swan/Croatia/30/2017                     | NA                                | Croatian Veterinary Institute     |
| EPI891670  | HA      | Croatia        | A/greylag goose/Croatia/33/2017                 | NA                                | Croatian Veterinary Institute     |
| EPI917275  | HA      | Croatia        | A/mute swan/Croatia/61/2017                     | NA                                | Croatian Veterinary Institute     |
| EPI917277  | HA      | Croatia        | A/chicken/Croatia/70/2017                       | NA                                | Croatian Veterinary Institute     |
| EPI1021086 | HA      | Czech Republic | A/mute swan/Czech Republic/54-17_1/2017 (H5N8)  | State Veterinary Institute Prague | State Veterinary Institute Prague |
| EPI1021087 | HA      | Czech Republic | A/goose/Czech Republic/136-17_1/2017 (H5N8)     | State Veterinary Institute Prague | State Veterinary Institute Prague |
| EPI1021088 | HA      | Czech Republic | A/mallard/Czech Republic/136-17_2/2017 (H5N8)   | State Veterinary Institute Prague | State Veterinary Institute Prague |
| EPI1021089 | HA      | Czech Republic | A/goose/Czech Republic/197-17/2017 (H5N8)       | State Veterinary Institute Prague | State Veterinary Institute Prague |
| EPI1021090 | HA      | Czech Republic | A/chicken/Czech Republic/508-17_1/2017 (H5N8)   | State Veterinary Institute Prague | State Veterinary Institute Prague |
| EPI1021091 | HA      | Czech Republic | A/mallard/Czech Republic/508-17_4/2017 (H5N8)   | State Veterinary Institute Prague | State Veterinary Institute Prague |
| EPI1021092 | HA      | Czech Republic | A/mute swan/Czech Republic/572-17_3/2017 (H5N8) | State Veterinary Institute Prague | State Veterinary Institute Prague |
| EPI1021093 | HA      | Czech Republic | A/mute swan/Czech Republic/964-17/2017 (H5N8)   | State Veterinary Institute Prague | State Veterinary Institute Prague |
| EPI1021094 | HA      | Czech Republic | A/mute swan/Czech Republic/967-17/2017 (H5N8)   | State Veterinary Institute Prague | State Veterinary Institute Prague |

| Segment ID | Segment | Country        | Isolate name                                     | Originating Laboratory            | Submitting Laboratory             |
|------------|---------|----------------|--------------------------------------------------|-----------------------------------|-----------------------------------|
| EPI1021095 | HA      | Czech Republic | A/mute swan/Czech Republic/987-17_2/2017 (H5N8)  | State Veterinary Institute Prague | State Veterinary Institute Prague |
| EPI1021096 | HA      | Czech Republic | A/mute swan/Czech Republic/1058-17/2017 (H5N8)   | State Veterinary Institute Prague | State Veterinary Institute Prague |
| EPI1021097 | HA      | Czech Republic | A/mute swan/Czech Republic/1060-17/2017 (H5N8)   | State Veterinary Institute Prague | State Veterinary Institute Prague |
| EPI1021098 | HA      | Czech Republic | A/mute swan/Czech Republic/1155-17/2017 (H5N8)   | State Veterinary Institute Prague | State Veterinary Institute Prague |
| EPI1021099 | HA      | Czech Republic | A/mute swan/Czech Republic/1156-17/2017 (H5N8)   | State Veterinary Institute Prague | State Veterinary Institute Prague |
| EPI1021100 | HA      | Czech Republic | A/mute swan/Czech Republic/1170-17_2/2017 (H5N8) | State Veterinary Institute Prague | State Veterinary Institute Prague |
| EPI1021101 | HA      | Czech Republic | A/mute swan/Czech Republic/1171-17/2017 (H5N8)   | State Veterinary Institute Prague | State Veterinary Institute Prague |
| EPI1021102 | HA      | Czech Republic | A/chicken/Czech Republic/1208-17_1/2017 (H5N8)   | State Veterinary Institute Prague | State Veterinary Institute Prague |
| EPI1021103 | HA      | Czech Republic | A/mallard/Czech Republic/1219-17_1/2017 (H5N8)   | State Veterinary Institute Prague | State Veterinary Institute Prague |
| EPI1021104 | HA      | Czech Republic | A/mallard/Czech Republic/1226-17/2017 (H5N8)     | State Veterinary Institute Prague | State Veterinary Institute Prague |
| EPI1021105 | HA      | Czech Republic | A/mute swan/Czech Republic/1227-17/2017 (H5N8)   | State Veterinary Institute Prague | State Veterinary Institute Prague |
| EPI1021106 | HA      | Czech Republic | A/mute swan/Czech Republic/1296-17_1/2017 (H5N8) | State Veterinary Institute Prague | State Veterinary Institute Prague |
| EPI1021107 | HA      | Czech Republic | A/mute swan/Czech Republic/1330-17_1/2017 (H5N8) | State Veterinary Institute Prague | State Veterinary Institute Prague |
| EPI1021108 | HA      | Czech Republic | A/mute swan/Czech Republic/1331-17_1/2017 (H5N8) | State Veterinary Institute Prague | State Veterinary Institute Prague |
| EPI1021109 | HA      | Czech Republic | A/mute swan/Czech Republic/1337-17/2017 (H5N8)   | State Veterinary Institute Prague | State Veterinary Institute Prague |

| Segment ID | Segment | Country        | Isolate name                                              | Originating Laboratory            | Submitting Laboratory             |
|------------|---------|----------------|-----------------------------------------------------------|-----------------------------------|-----------------------------------|
| EPI1021110 | HA      | Czech Republic | A/mute swan/Czech Republic/1339-17/2017 (H5N8)            | State Veterinary Institute Prague | State Veterinary Institute Prague |
| EPI1021111 | HA      | Czech Republic | A/chicken/Czech Republic/1344-17/2017 (H5N8)              | State Veterinary Institute Prague | State Veterinary Institute Prague |
| EPI1021112 | HA      | Czech Republic | A/mute swan/Czech Republic/1461-17/2017 (H5N8)            | State Veterinary Institute Prague | State Veterinary Institute Prague |
| EPI1021113 | HA      | Czech Republic | A/chicken/Czech Republic/1465-17/2017 (H5N8)              | State Veterinary Institute Prague | State Veterinary Institute Prague |
| EPI1021114 | HA      | Czech Republic | A/mute swan/Czech Republic/1519-17/2017 (H5N8)            | State Veterinary Institute Prague | State Veterinary Institute Prague |
| EPI1021115 | HA      | Czech Republic | A/mute swan/Czech Republic/1576-17_C/2017 (H5N8)          | State Veterinary Institute Prague | State Veterinary Institute Prague |
| EPI1021116 | HA      | Czech Republic | A/mallard/Czech Republic/1577-17/2017 (H5N8)              | State Veterinary Institute Prague | State Veterinary Institute Prague |
| EPI1021117 | HA      | Czech Republic | A/mute swan/Czech Republic/1640-17/2017 (H5N8)            | State Veterinary Institute Prague | State Veterinary Institute Prague |
| EPI1021118 | HA      | Czech Republic | A/mallard/Czech Republic/1672-17/2017 (H5N8)              | State Veterinary Institute Prague | State Veterinary Institute Prague |
| EPI1021119 | HA      | Czech Republic | A/chicken/Czech Republic/1675-17_2/2017 (H5N8)            | State Veterinary Institute Prague | State Veterinary Institute Prague |
| EPI1021120 | HA      | Czech Republic | A/grey heron/Czech Republic/1680-17_2/2017 (H5N8)         | State Veterinary Institute Prague | State Veterinary Institute Prague |
| EPI1021121 | HA      | Czech Republic | A/Indian Runner Duck/Czech Republic/1683-17_1/2017 (H5N8) | State Veterinary Institute Prague | State Veterinary Institute Prague |
| EPI1021122 | HA      | Czech Republic | A/chicken/Czech Republic/1687-17_2/2017 (H5N8)            | State Veterinary Institute Prague | State Veterinary Institute Prague |
| EPI1021123 | HA      | Czech Republic | A/chicken/Czech Republic/1688-17_1/2017 (H5N8)            | State Veterinary Institute Prague | State Veterinary Institute Prague |
| EPI1021124 | HA      | Czech Republic | A/chicken/Czech Republic/1689-17/2017 (H5N8)              | State Veterinary Institute Prague | State Veterinary Institute Prague |



| Segment ID | Segment | Country        | Isolate name                                         | Originating Laboratory            | Submitting Laboratory             |
|------------|---------|----------------|------------------------------------------------------|-----------------------------------|-----------------------------------|
| EPI1021125 | HA      | Czech Republic | A/mallard/Czech Republic/1690-17_2/2017 (H5N8)       | State Veterinary Institute Prague | State Veterinary Institute Prague |
| EPI1021126 | HA      | Czech Republic | A/mute swan/Czech Republic/1691-17/2017 (H5N8)       | State Veterinary Institute Prague | State Veterinary Institute Prague |
| EPI1021127 | HA      | Czech Republic | A/bronze turkey/Czech Republic/1755-17_1/2017 (H5N8) | State Veterinary Institute Prague | State Veterinary Institute Prague |
| EPI1021128 | HA      | Czech Republic | A/turkey/Czech Republic/1767-17_2/2017 (H5N8)        | State Veterinary Institute Prague | State Veterinary Institute Prague |
| EPI1021129 | HA      | Czech Republic | A/mute swan/Czech Republic/1848-17_1/2017 (H5N8)     | State Veterinary Institute Prague | State Veterinary Institute Prague |
| EPI1021130 | HA      | Czech Republic | A/mute swan/Czech Republic/1848-17_2/2017 (H5N8)     | State Veterinary Institute Prague | State Veterinary Institute Prague |
| EPI1021131 | HA      | Czech Republic | A/chicken/Czech Republic/1953-17/2017 (H5N8)         | State Veterinary Institute Prague | State Veterinary Institute Prague |
| EPI1021132 | HA      | Czech Republic | A/goose/Czech Republic/1954-17/2017 (H5N8)           | State Veterinary Institute Prague | State Veterinary Institute Prague |
| EPI1021133 | HA      | Czech Republic | A/goose/Czech Republic/1998-17_1/2017 (H5N8)         | State Veterinary Institute Prague | State Veterinary Institute Prague |
| EPI1021134 | HA      | Czech Republic | A/mute swan/Czech Republic/2008-17_1/2017 (H5N8)     | State Veterinary Institute Prague | State Veterinary Institute Prague |
| EPI1021135 | HA      | Czech Republic | A/quail/Czech Republic/2063-17_1/2017 (H5N8)         | State Veterinary Institute Prague | State Veterinary Institute Prague |
| EPI1021136 | HA      | Czech Republic | A/chicken/Czech Republic/2216-17_1/2017 (H5N8)       | State Veterinary Institute Prague | State Veterinary Institute Prague |
| EPI1021138 | HA      | Czech Republic | A/chicken/Czech Republic/2514-17/2017 (H5N8)         | State Veterinary Institute Prague | State Veterinary Institute Prague |
| EPI1021139 | HA      | Czech Republic | A/mallard/Czech Republic/2641-17/2017 (H5N8)         | State Veterinary Institute Prague | State Veterinary Institute Prague |
| EPI1021140 | HA      | Czech Republic | A/chicken/Czech Republic/2677-17_2/2017 (H5N8)       | State Veterinary Institute Prague | State Veterinary Institute Prague |

| Segment ID | Segment | Country        | Isolate name                                       | Originating Laboratory            | Submitting Laboratory             |
|------------|---------|----------------|----------------------------------------------------|-----------------------------------|-----------------------------------|
| EPI1021141 | HA      | Czech Republic | A/mallard/Czech Republic/2678-17_1/2017 (H5N8)     | State Veterinary Institute Prague | State Veterinary Institute Prague |
| EPI1021142 | HA      | Czech Republic | A/mallard/Czech Republic/2820-17_1/2017 (H5N8)     | State Veterinary Institute Prague | State Veterinary Institute Prague |
| EPI1021143 | HA      | Czech Republic | A/mallard/Czech Republic/2820-17_2/2017 (H5N8)     | State Veterinary Institute Prague | State Veterinary Institute Prague |
| EPI1021144 | HA      | Czech Republic | A/mallard/Czech Republic/2821-17_1/2017 (H5N8)     | State Veterinary Institute Prague | State Veterinary Institute Prague |
| EPI1021145 | HA      | Czech Republic | A/chicken/Czech Republic/2821-17_2/2017 (H5N8)     | State Veterinary Institute Prague | State Veterinary Institute Prague |
| EPI1021146 | HA      | Czech Republic | A/mallard/Czech Republic/2822-17_1/2017 (H5N8)     | State Veterinary Institute Prague | State Veterinary Institute Prague |
| EPI1021147 | HA      | Czech Republic | A/chicken/Czech Republic/2822-17_2/2017 (H5N8)     | State Veterinary Institute Prague | State Veterinary Institute Prague |
| EPI1021148 | HA      | Czech Republic | A/chicken/Czech Republic/3507-17/2017 (H5N8)       | State Veterinary Institute Prague | State Veterinary Institute Prague |
| EPI1081894 | HA      | Czech Republic | A/turkey/Czech Republic/38-17_1/2017 (H5N8)        | State Veterinary Institute Prague | State Veterinary Institute Prague |
| EPI1087636 | HA      | Czech Republic | A/chicken/Czech Republic/988-17/2017 (H5N8)        | State Veterinary Institute Prague | State Veterinary Institute Prague |
| EPI887468  | HA      | Czech Republic | A/chicken/Czech Republic/206-17_2/2017(H5N8)       | NA                                | State Veterinary Institute Prague |
| EPI888277  | HA      | Czech Republic | A/turkey/Czech Republic/38-17_5/2017 (H5N8)        | NA                                | State Veterinary Institute Prague |
| EPI916385  | HA      | Czech Republic | A/mute swan/Czech Republic/653-17/2017 (H5N8)      | State Veterinary Institute Prague | State Veterinary Institute Prague |
| EPI916503  | HA      | Czech Republic | A/mallard/Czech Republic/722-17_2/2017 (H5N8)      | NA                                | State Veterinary Institute Prague |
| EPI916604  | HA      | Czech Republic | A/bronze turkey/Czech Republic/1414-17/2017 (H5N8) | NA                                | State Veterinary Institute Prague |

| Segment ID | Segment | Country        | Isolate name                                           | Originating Laboratory            | Submitting Laboratory             |
|------------|---------|----------------|--------------------------------------------------------|-----------------------------------|-----------------------------------|
| EPI917480  | HA      | Czech Republic | A/mute swan/Czech Republic/722-17_1/2017 (H5N8)        | State Veterinary Institute Prague | State Veterinary Institute Prague |
| EPI919636  | HA      | Czech Republic | A/chicken/Czech Republic/585-17_1/2017 (H5N8)          | State Veterinary Institute Prague | State Veterinary Institute Prague |
| EPI930838  | HA      | Czech Republic | A/mute swan/Czech Republic/54-17_2/2017 (H5N8)         | NA                                | State Veterinary Institute Prague |
| EPI930841  | HA      | Czech Republic | A/Indian Runner Duck/Czech Republic/749-17/2017 (H5N8) | NA                                | State Veterinary Institute Prague |
| EPI930843  | HA      | Czech Republic | A/chicken/Czech Republic/55-17_1/2017 (H5N8)           | NA                                | State Veterinary Institute Prague |
| EPI931110  | HA      | Czech Republic | A/mute swan/Czech Republic/879-17/2017 (H5N8)          | NA                                | State Veterinary Institute Prague |
| EPI931145  | HA      | Czech Republic | A/duck/Czech Republic/1467-17/2017 (H5N8)              | NA                                | State Veterinary Institute Prague |
| EPI931194  | HA      | Czech Republic | A/chicken/Czech Republic/1863-17_1/2017 (H5N8)         | NA                                | State Veterinary Institute Prague |
| EPI931197  | HA      | Czech Republic | A/chicken/Czech Republic/1896-17_1/2017 (H5N8)         | NA                                | State Veterinary Institute Prague |
| EPI942419  | HA      | Czech Republic | A/chicken/Czech Republic/2764-17_1/2017 (H5N8)         | NA                                | State Veterinary Institute Prague |
| EPI942420  | HA      | Czech Republic | A/chicken/Czech Republic/2764-17_2/2017 (H5N8)         | NA                                | State Veterinary Institute Prague |
| EPI961475  | HA      | Czech Republic | A/mute swan/Czech Republic/499-17/2017 (H5N8)          | NA                                | State Veterinary Institute Prague |
| EPI961484  | HA      | Czech Republic | A/mute swan/Czech Republic/581-17/2017 (H5N8)          | NA                                | State Veterinary Institute Prague |
| EPI961528  | HA      | Czech Republic | A/goose/Czech Republic/821-17_2/2017 (H5N8)            | NA                                | State Veterinary Institute Prague |
| EPI969259  | HA      | Czech Republic | A/mute swan/Czech Republic/1813-17/2017 (H5N8)         | NA                                | State Veterinary Institute Prague |

| Segment ID | Segment | Country        | Isolate name                                   | Originating Laboratory                                                                                     | Submitting Laboratory                                         |
|------------|---------|----------------|------------------------------------------------|------------------------------------------------------------------------------------------------------------|---------------------------------------------------------------|
| EPI969262  | HA      | Czech Republic | A/chicken/Czech Republic/2643-17_1/2017 (H5N8) | NA                                                                                                         | State Veterinary Institute Prague                             |
| EPI969265  | HA      | Czech Republic | A/chicken/Czech Republic/2644-17_1/2017 (H5N8) | NA                                                                                                         | State Veterinary Institute Prague                             |
| EPI969268  | HA      | Czech Republic | A/mallard/Czech Republic/2705-17/2017 (H5N8)   | NA                                                                                                         | State Veterinary Institute Prague                             |
| EPI860239  | HA      | Denmark        | A/tufted duck/Denmark/17740-1/2016             | Technical University of Denmark                                                                            | Technical University of Denmark                               |
| EPI909364  | HA      | Denmark        | A/tufted duck/Denmark/17740-1/2016             | Technical University of Denmark                                                                            | Animal and Plant Health Agency (APHA)                         |
| EPI868854  | HA      | Egypt          | A/Common-coot/Egypt/CA285/2016                 | National Laboratory for Veterinary Quality Control on Poultry production- Animal Health Research Institute | Animal Health Research Institute                              |
| EPI869687  | HA      | France         | A/decoy_duck/France/161104e/2016               | Anses (Ploufragan-Plouzané)                                                                                | French Agency for Food, Environmental and Occupational Health |
| EPI869809  | HA      | France         | A/duck/France/161108h/2016                     |                                                                                                            | French Agency for Food, Environmental and Occupational Health |
| EPI544756  | HA      | Germany        | A/turkey/Germany-MV/R2472/2014                 | NA                                                                                                         | Friedrich-Loeffler-Institut                                   |
| EPI552746  | HA      | Germany        | A/turkey/Germany/AR2485-86-L00899/2014         | NA                                                                                                         | Friedrich-Loeffler-Institut                                   |
| EPI553145  | HA      | Germany        | A/turkey/Germany-NI/R3372/2014                 | NA                                                                                                         | Friedrich-Loeffler-Institut                                   |
| EPI553172  | HA      | Germany        | A/turkey/Germany-NI/R3372/2014                 | NA                                                                                                         | Friedrich-Loeffler-Institut                                   |
| EPI554605  | HA      | Germany        | A/domestic duck/Germany-NI/R3468/2014          | NA                                                                                                         | Friedrich-Loeffler-Institut                                   |
| EPI554607  | HA      | Germany        | A/mallard/Germany-ST/R23/2015                  | NA                                                                                                         | Friedrich-Loeffler-Institut                                   |
| EPI555126  | HA      | Germany        | A/stork/Germany-MV/R24/2015                    | NA                                                                                                         | Friedrich-Loeffler-Institut                                   |

| Segment ID | Segment | Country | Isolate name                             | Originating Laboratory | Submitting Laboratory       |
|------------|---------|---------|------------------------------------------|------------------------|-----------------------------|
| EPI556967  | HA      | Germany | A/chicken/Germany-MV/R153/2015           | NA                     | Friedrich-Loeffler-Institut |
| EPI566027  | HA      | Germany | A/ibis/Germany-MV/R44/2015               | NA                     | Friedrich-Loeffler-Institut |
| EPI624535  | HA      | Germany | A/scarlet_ibis/Germany/AR44-L01279/2015  | NA                     | Friedrich-Loeffler-Institut |
| EPI687239  | HA      | Germany | A/turkey/Germany/AR3390-L00939/2014      | NA                     | Friedrich-Loeffler-Institut |
| EPI687247  | HA      | Germany | A/turkey/Germany/AR3382-L00937/2014      | NA                     | Friedrich-Loeffler-Institut |
| EPI691836  | HA      | Germany | A/gull/Germany-NI/R45/2015               | NA                     | Friedrich-Loeffler-Institut |
| EPI859212  | HA      | Germany | A/tufted_duck/Germany-SH/R8446/2016      | NA                     | Friedrich-Loeffler-Institut |
| EPI859650  | HA      | Germany | A/wild_duck/Germany-BW/R8455/2016        | NA                     | Friedrich-Loeffler-Institut |
| EPI859653  | HA      | Germany | A/tufted_duck/Germany/AR8444-L01986/2016 | NA                     | Friedrich-Loeffler-Institut |
| EPI860393  | HA      | Germany | A/tufted_duck/Germany/AR8444-L01987/2016 | NA                     | Friedrich-Loeffler-Institut |
| EPI860401  | HA      | Germany | A/tufted_duck/Germany/AR8459-L01988/2016 | NA                     | Friedrich-Loeffler-Institut |
| EPI860509  | HA      | Germany | A/tufted_duck/Germany-SH/R8444/2016      | NA                     | Friedrich-Loeffler-Institut |
| EPI861011  | HA      | Germany | A/turkey/Germany-SH/R8595/2016           | NA                     | Friedrich-Loeffler-Institut |
| EPI861012  | HA      | Germany | A/chicken/Germany-MV/R8790/2016          | NA                     | Friedrich-Loeffler-Institut |
| EPI861222  | HA      | Germany | A/tufted_duck/Germany-SN/R8795/2016      | NA                     | Friedrich-Loeffler-Institut |

| Segment ID | Segment | Country | Isolate name                           | Originating Laboratory | Submitting Laboratory       |
|------------|---------|---------|----------------------------------------|------------------------|-----------------------------|
| EPI861224  | HA      | Germany | A/chicken/Germany-SH/R8758/2016        | NA                     | Friedrich-Loeffler-Institut |
| EPI876474  | HA      | Germany | A/turkey/Germany-NI/R10523/2016        | NA                     | Friedrich-Loeffler-Institut |
| EPI881292  | HA      | Germany | A/domestic duck/Germany-MV/R9869/2016  | NA                     | Friedrich-Loeffler-Institut |
| EPI907346  | HA      | Germany | A/domestic duck/Germany-BB/R681ff/2017 | NA                     | Friedrich-Loeffler-Institut |
| EPI922444  | HA      | Germany | A/domestic goose/Germany-BY/R677/2017  | NA                     | Friedrich-Loeffler-Institut |
| EPI922508  | HA      | Germany | A/chicken/Germany-NI/R11406/2016       | NA                     | Friedrich-Loeffler-Institut |
| EPI931207  | HA      | Germany | A/turkey/Germany-BB/R234ff/2017        | NA                     | Friedrich-Loeffler-Institut |
| EPI932938  | HA      | Germany | A/chicken/Germany-MV/R10048/2016       | NA                     | Friedrich-Loeffler-Institut |
| EPI963516  | HA      | Germany | A/domestic duck/Germany-MV/R9764/2016  | NA                     | Friedrich-Loeffler-Institut |
| EPI967465  | HA      | Germany | A/turkey/Germany-NI/R9807/2016         | NA                     | Friedrich-Loeffler-Institut |
| EPI969347  | HA      | Germany | A/turkey/Germany-BB/R377ff/2017        | NA                     | Friedrich-Loeffler-Institut |
| EPI973841  | HA      | Germany | A/white stork/Germany-TH/R1149/2017    | NA                     | Friedrich-Loeffler-Institut |
| EPI973844  | HA      | Germany | A/tawny owl/Germany-SN/R1186/2017      | NA                     | Friedrich-Loeffler-Institut |
| EPI978863  | HA      | Germany | A/grey heron/Germany-TH/R1125/2017     | NA                     | Friedrich-Loeffler-Institut |
| EPI978865  | HA      | Germany | A/mute swan/Germany-TH/R1126/2017      | NA                     | Friedrich-Loeffler-Institut |

| Segment ID | Segment | Country | Isolate name                                   | Originating Laboratory                                                                               | Submitting Laboratory                                         |
|------------|---------|---------|------------------------------------------------|------------------------------------------------------------------------------------------------------|---------------------------------------------------------------|
| EPI988345  | HA      | Germany | A/black swan/Germany-BW/R1364/2017             | NA                                                                                                   | Friedrich-Loeffler-Institut                                   |
| EPI990770  | HA      | Germany | A/eurasian wigeon/Germany-NI/AR249-L02143/2017 | NA                                                                                                   | Friedrich-Loeffler-Institut                                   |
| EPI990786  | HA      | Germany | A/mute swan/Germany-NI/AR1529-L02145/2017      | NA                                                                                                   | Friedrich-Loeffler-Institut                                   |
| EPI990794  | HA      | Germany | A/greylag goose/Germany-NI/AR1395-L02144/2017  | NA                                                                                                   | Friedrich-Loeffler-Institut                                   |
| EPI990802  | HA      | Germany | A/greylag goose/Germany-NI/AR703-L02138/2017   | NA                                                                                                   | Friedrich-Loeffler-Institut                                   |
| EPI1032476 | HA      | Hungary | A/Goose/Hungary/17261/2017                     | National Food Chain Safety Office Veterinary Diagnostic Directorate Laboratory for Molecular Biology | Central Agricultural Office Veterinary Diagnostic Directorate |
| EPI1032484 | HA      | Hungary | A/Goose/Hungary/15729/2017                     | National Food Chain Safety Office Veterinary Diagnostic Directorate Laboratory for Molecular Biology | Central Agricultural Office Veterinary Diagnostic Directorate |
| EPI1032492 | HA      | Hungary | A/Goose/Hungary/17051/2017                     | National Food Chain Safety Office Veterinary Diagnostic Directorate Laboratory for Molecular Biology | Central Agricultural Office Veterinary Diagnostic Directorate |
| EPI1032500 | HA      | Hungary | A/Goose/Hungary/17580/2017                     | National Food Chain Safety Office Veterinary Diagnostic Directorate Laboratory for Molecular Biology | Central Agricultural Office Veterinary Diagnostic Directorate |
| EPI1032508 | HA      | Hungary | A/Goose/Hungary/17985/2017                     | National Food Chain Safety Office Veterinary Diagnostic Directorate Laboratory for Molecular Biology | Central Agricultural Office Veterinary Diagnostic Directorate |
| EPI1032516 | HA      | Hungary | A/Goose/Hungary/59763/2016                     | National Food Chain Safety Office Veterinary Diagnostic Directorate Laboratory for Molecular Biology | Central Agricultural Office Veterinary Diagnostic Directorate |
| EPI1032524 | HA      | Hungary | A/Mulard_duck/Hungary/60369/2016               | National Food Chain Safety Office Veterinary Diagnostic Directorate Laboratory for Molecular Biology | Central Agricultural Office Veterinary Diagnostic Directorate |
| EPI1032532 | HA      | Hungary | A/Mulard_duck/Hungary/62902/2016               | National Food Chain Safety Office Veterinary Diagnostic Directorate Laboratory for Molecular Biology | Central Agricultural Office Veterinary Diagnostic Directorate |
| EPI1032540 | HA      | Hungary | A/Goose/Hungary/63743/2016                     | National Food Chain Safety Office Veterinary Diagnostic Directorate Laboratory for Molecular Biology | Central Agricultural Office Veterinary Diagnostic Directorate |
| EPI1032548 | HA      | Hungary | A/Goose/Hungary/64909/2016                     | National Food Chain Safety Office Veterinary Diagnostic Directorate Laboratory for Molecular Biology | Central Agricultural Office Veterinary Diagnostic Directorate |

| Segment ID | Segment | Country | Isolate name                         | Originating Laboratory                                                                               | Submitting Laboratory                                         |
|------------|---------|---------|--------------------------------------|------------------------------------------------------------------------------------------------------|---------------------------------------------------------------|
| EPI1032549 | HA      | Hungary | A/Mulard_duck/Hungary/59163/2016     | National Food Chain Safety Office Veterinary Diagnostic Directorate Laboratory for Molecular Biology | Central Agricultural Office Veterinary Diagnostic Directorate |
| EPI584823  | HA      | Hungary | A/domestic duck/Hungary/7341/2015    | Central Agricultural Office Veterinary Diagnostic Directorate                                        | Central Agricultural Office Veterinary Diagnostic Directorate |
| EPI859199  | HA      | Hungary | A/mute_swan/Hungary/51049/2016       | National Food Chain Safety Office Veterinary Diagnostic Directorate Laboratory for Molecular Biology | Central Agricultural Office Veterinary Diagnostic Directorate |
| EPI859207  | HA      | Hungary | A/domestic_turkey/Hungary/53433/2016 | National Food Chain Safety Office Veterinary Diagnostic Directorate Laboratory for Molecular Biology | Central Agricultural Office Veterinary Diagnostic Directorate |
| EPI860518  | HA      | Hungary | A/Mulard_duck/Hungary/54494/2016     | National Food Chain Safety Office Veterinary Diagnostic Directorate Laboratory for Molecular Biology | Central Agricultural Office Veterinary Diagnostic Directorate |
| EPI860519  | HA      | Hungary | A/goose/Hungary/55128/2016           | National Food Chain Safety Office Veterinary Diagnostic Directorate Laboratory for Molecular Biology | Central Agricultural Office Veterinary Diagnostic Directorate |
| EPI860534  | HA      | Hungary | A/duck/Hungary/55191/2016            | National Food Chain Safety Office Veterinary Diagnostic Directorate Laboratory for Molecular Biology | Central Agricultural Office Veterinary Diagnostic Directorate |
| EPI866976  | HA      | Hungary | A/chicken/Hungary/59048/2016         | National Food Chain Safety Office Veterinary Diagnostic Directorate Laboratory for Molecular Biology | Central Agricultural Office Veterinary Diagnostic Directorate |
| EPI866978  | HA      | Hungary | A/duck/Hungary/60441/2016            | National Food Chain Safety Office Veterinary Diagnostic Directorate Laboratory for Molecular Biology | Central Agricultural Office Veterinary Diagnostic Directorate |
| EPI953337  | HA      | Hungary | A/mallard/Hungary/57857/2016         | Central Agricultural Office Veterinary Diagnostic Directorate                                        | Central Agricultural Office Veterinary Diagnostic Directorate |
| EPI954539  | HA      | Hungary | A/Goose/Hungary/65817/2016           | Central Agricultural Office Veterinary Diagnostic Directorate                                        | Central Agricultural Office Veterinary Diagnostic Directorate |
| EPI954631  | HA      | Hungary | A/Mute swan/Hungary/119/2017         | Central Agricultural Office Veterinary Diagnostic Directorate                                        | Central Agricultural Office Veterinary Diagnostic Directorate |
| EPI954639  | HA      | Hungary | A/Harris Hawk/Hungary/120/2017       | Central Agricultural Office Veterinary Diagnostic Directorate                                        | Central Agricultural Office Veterinary Diagnostic Directorate |
| EPI954647  | HA      | Hungary | A/Goose/Hungary/982/2017             | Central Agricultural Office Veterinary Diagnostic Directorate                                        | Central Agricultural Office Veterinary Diagnostic Directorate |
| EPI954655  | HA      | Hungary | A/Duck/Hungary/984/2017              | Central Agricultural Office Veterinary Diagnostic Directorate                                        | Central Agricultural Office Veterinary Diagnostic Directorate |



| Segment ID | Segment | Country | Isolate name                         | Originating Laboratory                                                                               | Submitting Laboratory                                         |
|------------|---------|---------|--------------------------------------|------------------------------------------------------------------------------------------------------|---------------------------------------------------------------|
| EPI954663  | HA      | Hungary | A/Goose/Hungary/1030/2017            | Central Agricultural Office Veterinary Diagnostic Directorate                                        | Central Agricultural Office Veterinary Diagnostic Directorate |
| EPI954671  | HA      | Hungary | A/Duck/Hungary/1588/2017             | Central Agricultural Office Veterinary Diagnostic Directorate                                        | Central Agricultural Office Veterinary Diagnostic Directorate |
| EPI954679  | HA      | Hungary | A/Greylag_goose/Hungary/1941/2017    | Central Agricultural Office Veterinary Diagnostic Directorate                                        | Central Agricultural Office Veterinary Diagnostic Directorate |
| EPI954687  | HA      | Hungary | A/Mute swan/Hungary/1955/2017        | Central Agricultural Office Veterinary Diagnostic Directorate                                        | Central Agricultural Office Veterinary Diagnostic Directorate |
| EPI954695  | HA      | Hungary | A/Turkey/Hungary/2030/2017           | Central Agricultural Office Veterinary Diagnostic Directorate                                        | Central Agricultural Office Veterinary Diagnostic Directorate |
| EPI954703  | HA      | Hungary | A/Mute swan/Hungary/2193/2017        | Central Agricultural Office Veterinary Diagnostic Directorate                                        | Central Agricultural Office Veterinary Diagnostic Directorate |
| EPI954711  | HA      | Hungary | A/Mute swan/Hungary/2508/2017        | Central Agricultural Office Veterinary Diagnostic Directorate                                        | Central Agricultural Office Veterinary Diagnostic Directorate |
| EPI954719  | HA      | Hungary | A/Mute swan/Hungary/2825/2017        | Central Agricultural Office Veterinary Diagnostic Directorate                                        | Central Agricultural Office Veterinary Diagnostic Directorate |
| EPI954727  | HA      | Hungary | A/Mute swan/Hungary/3139/2017        | Central Agricultural Office Veterinary Diagnostic Directorate                                        | Central Agricultural Office Veterinary Diagnostic Directorate |
| EPI954735  | HA      | Hungary | A/Mute swan/Hungary/3513/2017        | Central Agricultural Office Veterinary Diagnostic Directorate                                        | Central Agricultural Office Veterinary Diagnostic Directorate |
| EPI954743  | HA      | Hungary | A/Mute swan/Hungary/3542/2017        | Central Agricultural Office Veterinary Diagnostic Directorate                                        | Central Agricultural Office Veterinary Diagnostic Directorate |
| EPI954751  | HA      | Hungary | A/Chicken/Hungary/2496/2017          | National Food Chain Safety Office Veterinary Diagnostic Directorate Laboratory for Molecular Biology | Central Agricultural Office Veterinary Diagnostic Directorate |
| EPI954759  | HA      | Hungary | A/Peregrine_falcon/Hungary/4882/2017 | Central Agricultural Office Veterinary Diagnostic Directorate                                        | Central Agricultural Office Veterinary Diagnostic Directorate |
| EPI954767  | HA      | Hungary | A/Mute swan/Hungary/5316/2017        | Central Agricultural Office Veterinary Diagnostic Directorate                                        | Central Agricultural Office Veterinary Diagnostic Directorate |
| EPI954775  | HA      | Hungary | A/Common_buzzard/Hungary/7061/2017   | Central Agricultural Office Veterinary Diagnostic Directorate                                        | Central Agricultural Office Veterinary Diagnostic Directorate |

| Segment ID | Segment | Country | Isolate name                           | Originating Laboratory                                                                               | Submitting Laboratory                                         |
|------------|---------|---------|----------------------------------------|------------------------------------------------------------------------------------------------------|---------------------------------------------------------------|
| EPI954783  | HA      | Hungary | A/Common_tern/Hungary/8187/2017        | Central Agricultural Office Veterinary Diagnostic Directorate                                        | Central Agricultural Office Veterinary Diagnostic Directorate |
| EPI954791  | HA      | Hungary | A/Harris_hawk/Hungary/2762a/2017       | Central Agricultural Office Veterinary Diagnostic Directorate                                        | Central Agricultural Office Veterinary Diagnostic Directorate |
| EPI954799  | HA      | Hungary | A/Harris_hawk/Hungary/2762b/2017       | Central Agricultural Office Veterinary Diagnostic Directorate                                        | Central Agricultural Office Veterinary Diagnostic Directorate |
| EPI954813  | HA      | Hungary | A/Greylag_goose/Hungary/320/2017       | Central Agricultural Office Veterinary Diagnostic Directorate                                        | Central Agricultural Office Veterinary Diagnostic Directorate |
| EPI954821  | HA      | Hungary | A/GuineaFowl/Hungary/596/2017          | Central Agricultural Office Veterinary Diagnostic Directorate                                        | Central Agricultural Office Veterinary Diagnostic Directorate |
| EPI954829  | HA      | Hungary | A/Chicken/Hungary/1751/2017            | Central Agricultural Office Veterinary Diagnostic Directorate                                        | Central Agricultural Office Veterinary Diagnostic Directorate |
| EPI954837  | HA      | Hungary | A/Mute swan/Hungary/3137/2017          | Central Agricultural Office Veterinary Diagnostic Directorate                                        | Central Agricultural Office Veterinary Diagnostic Directorate |
| EPI954845  | HA      | Hungary | A/Mallard/Hungary/5821/2017            | Central Agricultural Office Veterinary Diagnostic Directorate                                        | Central Agricultural Office Veterinary Diagnostic Directorate |
| EPI954861  | HA      | Hungary | A/Mallard/Hungary/1574b/2017           | Central Agricultural Office Veterinary Diagnostic Directorate                                        | Central Agricultural Office Veterinary Diagnostic Directorate |
| EPI954869  | HA      | Hungary | A/White_fronted_goose/Hungary/801/2017 | Central Agricultural Office Veterinary Diagnostic Directorate                                        | Central Agricultural Office Veterinary Diagnostic Directorate |
| EPI954877  | HA      | Hungary | A/Mallard/Hungary/1574a/2017           | Central Agricultural Office Veterinary Diagnostic Directorate                                        | Central Agricultural Office Veterinary Diagnostic Directorate |
| EPI956128  | HA      | Hungary | A/Goose/Hungary/59712/2016             | Central Agricultural Office Veterinary Diagnostic Directorate                                        | Central Agricultural Office Veterinary Diagnostic Directorate |
| EPI959523  | HA      | Hungary | A/Cormorant/Hungary/6102/2017          | National Food Chain Safety Office Veterinary Diagnostic Directorate Laboratory for Molecular Biology | Central Agricultural Office Veterinary Diagnostic Directorate |
| EPI959531  | HA      | Hungary | A/Mute swan/Hungary/6092/2017          | National Food Chain Safety Office Veterinary Diagnostic Directorate Laboratory for Molecular Biology | Central Agricultural Office Veterinary Diagnostic Directorate |
| EPI959539  | HA      | Hungary | A/Mute swan/Hungary/6276/2017          | National Food Chain Safety Office Veterinary Diagnostic Directorate Laboratory for Molecular Biology | Central Agricultural Office Veterinary Diagnostic Directorate |

| Segment ID | Segment | Country | Isolate name                      | Originating Laboratory                                                                               | Submitting Laboratory                                         |
|------------|---------|---------|-----------------------------------|------------------------------------------------------------------------------------------------------|---------------------------------------------------------------|
| EPI959547  | HA      | Hungary | A/Pheasant/Hungary/6553/2017      | National Food Chain Safety Office Veterinary Diagnostic Directorate Laboratory for Molecular Biology | Central Agricultural Office Veterinary Diagnostic Directorate |
| EPI959555  | HA      | Hungary | A/Pheasant/Hungary/7685/2017      | National Food Chain Safety Office Veterinary Diagnostic Directorate Laboratory for Molecular Biology | Central Agricultural Office Veterinary Diagnostic Directorate |
| EPI959563  | HA      | Hungary | A/Rook/Hungary/4975/2017          | National Food Chain Safety Office Veterinary Diagnostic Directorate Laboratory for Molecular Biology | Central Agricultural Office Veterinary Diagnostic Directorate |
| EPI962046  | HA      | Hungary | A/Duck/Hungary/54738/2016         | National Food Chain Safety Office Veterinary Diagnostic Directorate Laboratory for Molecular Biology | Central Agricultural Office Veterinary Diagnostic Directorate |
| EPI962056  | HA      | Hungary | A/Duck/Hungary/55764/2016         | National Food Chain Safety Office Veterinary Diagnostic Directorate Laboratory for Molecular Biology | Central Agricultural Office Veterinary Diagnostic Directorate |
| EPI962066  | HA      | Hungary | A/Turkey/Hungary/53136/2016       | National Food Chain Safety Office Veterinary Diagnostic Directorate Laboratory for Molecular Biology | Central Agricultural Office Veterinary Diagnostic Directorate |
| EPI858836  | HA      | India   | A/duck/India/10CA01/2016          | ICAR-National Institute of High Security Animal Diseases                                             | ICAR-National Institute of High Security Animal Diseases      |
| EPI858844  | HA      | India   | A/painted stork/India/10CA03/2016 | ICAR-National Institute of High Security Animal Diseases                                             | ICAR-National Institute of High Security Animal Diseases      |
| EPI517161  | HA      | Japan   | A/Chicken/Kumamoto/1-7/2014       | National Institute of Animal Health                                                                  | National Agriculture and Food Research Organization           |
| EPI548485  | HA      | Japan   | A/duck/Chiba/26-372-48/2014       | National Institute of Animal Health                                                                  | National Institute of Animal Health                           |
| EPI548493  | HA      | Japan   | A/duck/Chiba/26-372-61/2014       | National Institute of Animal Health                                                                  | National Institute of Animal Health                           |
| EPI553208  | HA      | Japan   | A/crane/Kagoshima/KU1/2014        | Kagoshima University                                                                                 | Kagoshima University                                          |
| EPI553343  | HA      | Japan   | A/chicken/Miyazaki/7/2014         | NA                                                                                                   | National Institute of Animal Health                           |
| EPI573638  | HA      | Japan   | A/crane/Kagoshima/KU13/2014(H5N8) | Kagoshima University                                                                                 | Kagoshima University                                          |
| EPI573646  | HA      | Japan   | A/crane/Kagoshima/KU21/2014(H5N8) | Kagoshima University                                                                                 | Kagoshima University                                          |

| Segment ID | Segment | Country            | Isolate name                              | Originating Laboratory                                   | Submitting Laboratory                                    |
|------------|---------|--------------------|-------------------------------------------|----------------------------------------------------------|----------------------------------------------------------|
| EPI573654  | HA      | Japan              | A/crane/Kagoshima/KU41/2014(H5N8)         | Kagoshima University                                     | Kagoshima University                                     |
| EPI573664  | HA      | Japan              | A/crane/Kagoshima/KU53/2015(H5N8)         | Kagoshima University                                     | Kagoshima University                                     |
| EPI573672  | HA      | Japan              | A/mallard duck/Kagoshima/KU70/2015(H5N8)  | Kagoshima University                                     | Kagoshima University                                     |
| EPI573680  | HA      | Japan              | A/mallard duck/Kagoshima/KU116/2015(H5N8) | Kagoshima University                                     | Kagoshima University                                     |
| EPI662624  | HA      | Japan              | A/chicken/Saga/1-1/2015                   | National Institute of Animal Health                      | National Institute of Animal Health                      |
| EPI662632  | HA      | Japan              | A/chicken/Okayama/1-2/2015                | National Institute of Animal Health                      | National Institute of Animal Health                      |
| EPI662640  | HA      | Japan              | A/chicken/Yamaguchi/6/2014                | National Institute of Animal Health                      | National Institute of Animal Health                      |
| EPI662648  | HA      | Japan              | A/chicken/Miyazaki/2-4/2014               | National Institute of Animal Health                      | National Institute of Animal Health                      |
| EPI926621  | HA      | Kazakhstan         | A/graylag goose/Kazakhstan/KR/2016        | Research Institute of Experimental and Clinical Medicine | Research Institute of Experimental and Clinical Medicine |
| EPI573192  | HA      | Korea, Republic of | A/breeder chicken/Korea/H503/2014         | Animal and Plant Quarantine Agency                       | Animal and Plant Quarantine Agency (QIA)                 |
| EPI573194  | HA      | Korea, Republic of | A/breeder chicken/Korea/H818/2014         | NA                                                       | Animal and Plant Quarantine Agency (QIA)                 |
| EPI573195  | HA      | Korea, Republic of | A/breeder chicken/Korea/H818/2014         | NA                                                       | Animal and Plant Quarantine Agency (QIA)                 |
| EPI573196  | HA      | Korea, Republic of | A/broiler duck/Korea/H651/2014            | NA                                                       | Animal and Plant Quarantine Agency (QIA)                 |
| EPI573197  | HA      | Korea, Republic of | A/chicken/Korea/H881/2014                 | NA                                                       | Animal and Plant Quarantine Agency (QIA)                 |
| EPI573198  | HA      | Korea, Republic of | A/broiler duck/Korea/H959/2014            | NA                                                       | Animal and Plant Quarantine Agency (QIA)                 |

| Segment ID | Segment | Country            | Isolate name                             | Originating Laboratory             | Submitting Laboratory                    |
|------------|---------|--------------------|------------------------------------------|------------------------------------|------------------------------------------|
| EPI573199  | HA      | Korea, Republic of | A/breeder chicken/Korea/H1068/2014       | NA                                 | Animal and Plant Quarantine Agency (QIA) |
| EPI573200  | HA      | Korea, Republic of | A/Korean native chicken/Korea/H1139/2014 | NA                                 | Animal and Plant Quarantine Agency (QIA) |
| EPI573201  | HA      | Korea, Republic of | A/chicken/Korea/H1236/2014               | NA                                 | Animal and Plant Quarantine Agency (QIA) |
| EPI573202  | HA      | Korea, Republic of | A/chicken/Korea/H1268/2014               | Animal and Plant Quarantine Agency | Animal and Plant Quarantine Agency (QIA) |
| EPI573203  | HA      | Korea, Republic of | A/chicken/Korea/H1292/2014               | NA                                 | Animal and Plant Quarantine Agency (QIA) |
| EPI573204  | HA      | Korea, Republic of | A/goose/Korea/H1296/2014                 | NA                                 | Animal and Plant Quarantine Agency (QIA) |
| EPI573205  | HA      | Korea, Republic of | A/Korean native chicken/Korea/H1299/2014 | NA                                 | Animal and Plant Quarantine Agency (QIA) |
| EPI573206  | HA      | Korea, Republic of | A/breeder duck/Korea/H1343/2014          | NA                                 | Animal and Plant Quarantine Agency (QIA) |
| EPI573207  | HA      | Korea, Republic of | A/chicken/Korea/H1350/2014               | NA                                 | Animal and Plant Quarantine Agency (QIA) |
| EPI573208  | HA      | Korea, Republic of | A/gadwall/Korea/H1351/2014               | NA                                 | Animal and Plant Quarantine Agency (QIA) |
| EPI573209  | HA      | Korea, Republic of | A/broiler duck/Korea/H1413/2014          | NA                                 | Animal and Plant Quarantine Agency (QIA) |
| EPI573210  | HA      | Korea, Republic of | A/broiler duck/Korea/H1414/2014          | NA                                 | Animal and Plant Quarantine Agency (QIA) |
| EPI573211  | HA      | Korea, Republic of | A/goose/Korea/H1545/2014                 | NA                                 | Animal and Plant Quarantine Agency (QIA) |
| EPI573212  | HA      | Korea, Republic of | A/Korean native chicken/Korea/H1554/2014 | NA                                 | Animal and Plant Quarantine Agency (QIA) |
| EPI573213  | HA      | Korea, Republic of | A/broiler duck/Korea/H1556/2014          | NA                                 | Animal and Plant Quarantine Agency (QIA) |

| Segment ID | Segment | Country            | Isolate name                             | Originating Laboratory | Submitting Laboratory                    |
|------------|---------|--------------------|------------------------------------------|------------------------|------------------------------------------|
| EPI573214  | HA      | Korea, Republic of | A/broiler duck/Korea/H1582/2014          | NA                     | Animal and Plant Quarantine Agency (QIA) |
| EPI573215  | HA      | Korea, Republic of | A/breeder duck/Korea/H1596/2014          | NA                     | Animal and Plant Quarantine Agency (QIA) |
| EPI573216  | HA      | Korea, Republic of | A/broiler duck/Korea/H1683/2014          | NA                     | Animal and Plant Quarantine Agency (QIA) |
| EPI573217  | HA      | Korea, Republic of | A/broiler duck/Korea/H1685/2014          | NA                     | Animal and Plant Quarantine Agency (QIA) |
| EPI573218  | HA      | Korea, Republic of | A/Korean native chicken/Korea/H1687/2014 | NA                     | Animal and Plant Quarantine Agency (QIA) |
| EPI573219  | HA      | Korea, Republic of | A/goose/Korea/H1689/2014                 | NA                     | Animal and Plant Quarantine Agency (QIA) |
| EPI573220  | HA      | Korea, Republic of | A/goose/Korea/H1698/2014                 | NA                     | Animal and Plant Quarantine Agency (QIA) |
| EPI573221  | HA      | Korea, Republic of | A/broiler duck/Korea/H1731/2014          | NA                     | Animal and Plant Quarantine Agency (QIA) |
| EPI573222  | HA      | Korea, Republic of | A/broiler duck/Korea/H1733/2014          | NA                     | Animal and Plant Quarantine Agency (QIA) |
| EPI573223  | HA      | Korea, Republic of | A/broiler duck/Korea/H1734/2014          | NA                     | Animal and Plant Quarantine Agency (QIA) |
| EPI573224  | HA      | Korea, Republic of | A/broiler duck/Korea/H1739/2014          | NA                     | Animal and Plant Quarantine Agency (QIA) |
| EPI573225  | HA      | Korea, Republic of | A/broiler duck/Korea/H1745/2014          | NA                     | Animal and Plant Quarantine Agency (QIA) |
| EPI573226  | HA      | Korea, Republic of | A/Korean native chicken/Korea/H1747/2014 | NA                     | Animal and Plant Quarantine Agency (QIA) |
| EPI573227  | HA      | Korea, Republic of | A/breeder duck/Korea/H1752/2014          | NA                     | Animal and Plant Quarantine Agency (QIA) |
| EPI573228  | HA      | Korea, Republic of | A/broiler duck/Korea/H1755/2014          | NA                     | Animal and Plant Quarantine Agency (QIA) |

| Segment ID | Segment | Country            | Isolate name                             | Originating Laboratory                                                       | Submitting Laboratory                    |
|------------|---------|--------------------|------------------------------------------|------------------------------------------------------------------------------|------------------------------------------|
| EPI573229  | HA      | Korea, Republic of | A/broiler duck/Korea/H1763/2014          | NA                                                                           | Animal and Plant Quarantine Agency (QIA) |
| EPI573230  | HA      | Korea, Republic of | A/broiler duck/Korea/H1803/2014          | NA                                                                           | Animal and Plant Quarantine Agency (QIA) |
| EPI573231  | HA      | Korea, Republic of | A/broiler duck/Korea/H1839/2014          | NA                                                                           | Animal and Plant Quarantine Agency (QIA) |
| EPI573232  | HA      | Korea, Republic of | A/broiler duck/Korea/H1840/2014          | NA                                                                           | Animal and Plant Quarantine Agency (QIA) |
| EPI573233  | HA      | Korea, Republic of | A/Korean native chicken/Korea/H1847/2014 | NA                                                                           | Animal and Plant Quarantine Agency (QIA) |
| EPI573234  | HA      | Korea, Republic of | A/broiler duck/Korea/H1864/2014          | NA                                                                           | Animal and Plant Quarantine Agency (QIA) |
| EPI573235  | HA      | Korea, Republic of | A/Korean native chicken/Korea/H1903/2014 | NA                                                                           | Animal and Plant Quarantine Agency (QIA) |
| EPI573236  | HA      | Korea, Republic of | A/spot-billed duck/Korea/H1981/2014      | NA                                                                           | Animal and Plant Quarantine Agency (QIA) |
| EPI573237  | HA      | Korea, Republic of | A/mallard/Korea/H1991/2014               | NA                                                                           | Animal and Plant Quarantine Agency (QIA) |
| EPI573238  | HA      | Korea, Republic of | A/mallard/Korea/H2003/2014               | NA                                                                           | Animal and Plant Quarantine Agency (QIA) |
| EPI573239  | HA      | Korea, Republic of | A/mallard/Korea/H1924-6/2014             | NA                                                                           | Animal and Plant Quarantine Agency (QIA) |
| EPI573240  | HA      | Korea, Republic of | A/breeder duck/Korea/H345/2014           | NA                                                                           | Animal and Plant Quarantine Agency (QIA) |
| EPI573241  | HA      | Korea, Republic of | A/breeder duck/Korea/H566/2014           | NA                                                                           | Animal and Plant Quarantine Agency (QIA) |
| EPI573242  | HA      | Korea, Republic of | A/Common Teal/Korea/H844/2014            | NA                                                                           | Animal and Plant Quarantine Agency (QIA) |
| EPI595055  | HA      | Korea, Republic of | A/common teal/Korea/KU-12/2015           | Avian diseases laboratory, College of Veterinary Medicine, Konkuk University | Konkuk University                        |

| Segment ID | Segment | Country            | Isolate name                                       | Originating Laboratory                                                       | Submitting Laboratory                    |
|------------|---------|--------------------|----------------------------------------------------|------------------------------------------------------------------------------|------------------------------------------|
| EPI595066  | HA      | Korea, Republic of | A/mallard/Korea/KU3-2/2015                         | Avian diseases laboratory, College of Veterinary Medicine, Konkuk University | Konkuk University                        |
| EPI595079  | HA      | Korea, Republic of | A/mallard/Korea/N15-99/2015                        | Avian diseases laboratory, College of Veterinary Medicine, Konkuk University | Konkuk University                        |
| EPI595082  | HA      | Korea, Republic of | A/mandarin duck/Korea/K14-363-1/2014               | Avian diseases laboratory, College of Veterinary Medicine, Konkuk University | Konkuk University                        |
| EPI595094  | HA      | Korea, Republic of | A/mandarin duck/Korea/K14-366-1/2014               | Avian diseases laboratory, College of Veterinary Medicine, Konkuk University | Konkuk University                        |
| EPI595107  | HA      | Korea, Republic of | A/mandarin duck/Korea/K14-367-1/2014               | Avian diseases laboratory, College of Veterinary Medicine, Konkuk University | Konkuk University                        |
| EPI595116  | HA      | Korea, Republic of | A/greater white-fronted goose/Korea/K14-367-4/2014 | Avian diseases laboratory, College of Veterinary Medicine, Konkuk University | Konkuk University                        |
| EPI595124  | HA      | Korea, Republic of | A/greater white-fronted goose/Korea/K14-369-3/2014 | Avian diseases laboratory, College of Veterinary Medicine, Konkuk University | Konkuk University                        |
| EPI595133  | HA      | Korea, Republic of | A/greater white-fronted goose/Korea/K14-371-4/2014 | Avian diseases laboratory, College of Veterinary Medicine, Konkuk University | Konkuk University                        |
| EPI595138  | HA      | Korea, Republic of | A/greater white-fronted goose/Korea/K14-372-2/2014 | Avian diseases laboratory, College of Veterinary Medicine, Konkuk University | Konkuk University                        |
| EPI595146  | HA      | Korea, Republic of | A/greater white-fronted goose/Korea/K14-374-1/2014 | Avian diseases laboratory, College of Veterinary Medicine, Konkuk University | Konkuk University                        |
| EPI837541  | HA      | Korea, Republic of | A/breeder duck/Korea/H2086/2015                    | NA                                                                           | Animal and Plant Quarantine Agency (QIA) |
| EPI837542  | HA      | Korea, Republic of | A/mallard/Korea/H2102/2015                         | NA                                                                           | Animal and Plant Quarantine Agency (QIA) |
| EPI837543  | HA      | Korea, Republic of | A/broiler duck/Korea/H2116/2015                    | NA                                                                           | Animal and Plant Quarantine Agency (QIA) |
| EPI837544  | HA      | Korea, Republic of | A/broiler duck/Korea/H2194/2015                    | NA                                                                           | Animal and Plant Quarantine Agency (QIA) |
| EPI837545  | HA      | Korea, Republic of | A/broiler duck/Korea/H2266/2015                    | NA                                                                           | Animal and Plant Quarantine Agency (QIA) |



| Segment ID | Segment | Country            | Isolate name                             | Originating Laboratory | Submitting Laboratory                    |
|------------|---------|--------------------|------------------------------------------|------------------------|------------------------------------------|
| EPI837546  | HA      | Korea, Republic of | A/broiler duck/Korea/H2278/2015          | NA                     | Animal and Plant Quarantine Agency (QIA) |
| EPI837549  | HA      | Korea, Republic of | A/mallard/Korea/H2304/2015               | NA                     | Animal and Plant Quarantine Agency (QIA) |
| EPI837550  | HA      | Korea, Republic of | A/mallard/Korea/H2321/2015               | NA                     | Animal and Plant Quarantine Agency (QIA) |
| EPI837551  | HA      | Korea, Republic of | A/broiler duck/Korea/H2385/2015          | NA                     | Animal and Plant Quarantine Agency (QIA) |
| EPI837552  | HA      | Korea, Republic of | A/broiler duck/Korea/H2393/2015          | NA                     | Animal and Plant Quarantine Agency (QIA) |
| EPI837553  | HA      | Korea, Republic of | A/broiler duck/Korea/H2400/2015          | NA                     | Animal and Plant Quarantine Agency (QIA) |
| EPI837554  | HA      | Korea, Republic of | A/broiler duck/Korea/H2405/2015          | NA                     | Animal and Plant Quarantine Agency (QIA) |
| EPI837555  | HA      | Korea, Republic of | A/breeder chicken/Korea/H2496/2015       | NA                     | Animal and Plant Quarantine Agency (QIA) |
| EPI837556  | HA      | Korea, Republic of | A/broiler duck/Korea/H2517/2015          | NA                     | Animal and Plant Quarantine Agency (QIA) |
| EPI837557  | HA      | Korea, Republic of | A/broiler duck/Korea/H2531/2015          | NA                     | Animal and Plant Quarantine Agency (QIA) |
| EPI837558  | HA      | Korea, Republic of | A/chicken/Korea/H2553/2015               | NA                     | Animal and Plant Quarantine Agency (QIA) |
| EPI837559  | HA      | Korea, Republic of | A/chicken/Korea/H2565/2015               | NA                     | Animal and Plant Quarantine Agency (QIA) |
| EPI837560  | HA      | Korea, Republic of | A/chicken/Korea/H2590/2015               | NA                     | Animal and Plant Quarantine Agency (QIA) |
| EPI837561  | HA      | Korea, Republic of | A/korean native chicken/Korea/H2598/2015 | NA                     | Animal and Plant Quarantine Agency (QIA) |
| EPI837562  | HA      | Korea, Republic of | A/broiler duck/Korea/H2606/2015          | NA                     | Animal and Plant Quarantine Agency (QIA) |

| Segment ID | Segment | Country            | Isolate name                     | Originating Laboratory | Submitting Laboratory                    |
|------------|---------|--------------------|----------------------------------|------------------------|------------------------------------------|
| EPI837563  | HA      | Korea, Republic of | A/broiler duck/Korea/H2618/2015  | NA                     | Animal and Plant Quarantine Agency (QIA) |
| EPI837564  | HA      | Korea, Republic of | A/duck/Korea/H2627/2015          | NA                     | Animal and Plant Quarantine Agency (QIA) |
| EPI837565  | HA      | Korea, Republic of | A/duck/Korea/H2628/2015          | NA                     | Animal and Plant Quarantine Agency (QIA) |
| EPI837566  | HA      | Korea, Republic of | A/broildr duck/Korea/H2637/2015  | NA                     | Animal and Plant Quarantine Agency (QIA) |
| EPI837567  | HA      | Korea, Republic of | A/broiler duck/Korea/H2641/2015  | NA                     | Animal and Plant Quarantine Agency (QIA) |
| EPI837568  | HA      | Korea, Republic of | A/broiler duck/Korea/H2649/2015  | NA                     | Animal and Plant Quarantine Agency (QIA) |
| EPI837569  | HA      | Korea, Republic of | A/breeder duck/Korea/H2675/2015  | NA                     | Animal and Plant Quarantine Agency (QIA) |
| EPI837570  | HA      | Korea, Republic of | A/broiler duck/Korea/H2826/2015  | NA                     | Animal and Plant Quarantine Agency (QIA) |
| EPI837571  | HA      | Korea, Republic of | A/broiler duck/Korea/H2827/2015  | NA                     | Animal and Plant Quarantine Agency (QIA) |
| EPI837572  | HA      | Korea, Republic of | A/broiler duck/Korea/LBM334/2015 | NA                     | Animal and Plant Quarantine Agency (QIA) |
| EPI837573  | HA      | Korea, Republic of | A/mallard/Korea/H2891/2015       | NA                     | Animal and Plant Quarantine Agency (QIA) |
| EPI837574  | HA      | Korea, Republic of | A/broiler duck/Korea/H2910/2015  | NA                     | Animal and Plant Quarantine Agency (QIA) |
| EPI837575  | HA      | Korea, Republic of | A/broiler duck/Korea/H3078/2015  | NA                     | Animal and Plant Quarantine Agency (QIA) |
| EPI837576  | HA      | Korea, Republic of | A/broiler duck/Korea/H3092/2015  | NA                     | Animal and Plant Quarantine Agency (QIA) |
| EPI837577  | HA      | Korea, Republic of | A/broiler duck/Korea/H3093/2015  | NA                     | Animal and Plant Quarantine Agency (QIA) |

| Segment ID | Segment | Country            | Isolate name                                | Originating Laboratory                                     | Submitting Laboratory                    |
|------------|---------|--------------------|---------------------------------------------|------------------------------------------------------------|------------------------------------------|
| EPI837578  | HA      | Korea, Republic of | A/broiler duck/Korea/H3098/2015             | NA                                                         | Animal and Plant Quarantine Agency (QIA) |
| EPI837579  | HA      | Korea, Republic of | A/broiler duck/Korea/H3104/2015             | NA                                                         | Animal and Plant Quarantine Agency (QIA) |
| EPI837580  | HA      | Korea, Republic of | A/broiler duck/Korea/H3298/2015             | NA                                                         | Animal and Plant Quarantine Agency (QIA) |
| EPI837581  | HA      | Korea, Republic of | A/broiler duck/Korea/H3301/2015             | NA                                                         | Animal and Plant Quarantine Agency (QIA) |
| EPI837582  | HA      | Korea, Republic of | A/broiler duck/Korea/H3302/2015             | NA                                                         | Animal and Plant Quarantine Agency (QIA) |
| EPI837583  | HA      | Korea, Republic of | A/breeder duck/Korea/16AQ17/2016            | NA                                                         | Animal and Plant Quarantine Agency (QIA) |
| EPI837584  | HA      | Korea, Republic of | A/duck/Korea/16A02/2016                     | NA                                                         | Animal and Plant Quarantine Agency (QIA) |
| EPI952639  | HA      | Korea, Republic of | A/chicken/Korea/H903/2017                   | Avian disease division, Animal and Plant Quarantine Agency | Animal and Plant Quarantine Agency (QIA) |
| EPI952782  | HA      | Korea, Republic of | A/mallard duck/Korea/WA137/2017             | Avian disease division, Animal and Plant Quarantine Agency | Animal and Plant Quarantine Agency (QIA) |
| EPI1019366 | HA      | Netherlands        | A/Bk_swan/NL-Den Oever/16013973-002/2016    | Wageningen Bioveterinary Reseach                           | Central Veterinary Institute             |
| EPI1019374 | HA      | Netherlands        | A/Bl_H_gull/NL-Slootdorp/16014102-002/2016  | Wageningen Bioveterinary Reseach                           | Central Veterinary Institute             |
| EPI1019382 | HA      | Netherlands        | A/Buzzard/NL-Durgerdam/16015100-004/2016    | Wageningen Bioveterinary Reseach                           | Central Veterinary Institute             |
| EPI1019390 | HA      | Netherlands        | A/C_Gull/NL-Slootdorp/16014102-003/2016     | Wageningen Bioveterinary Reseach                           | Central Veterinary Institute             |
| EPI1019398 | HA      | Netherlands        | A/Ch/NL-Abbega/X16015736/2016               | Wageningen Bioveterinary Reseach                           | Central Veterinary Institute             |
| EPI1019406 | HA      | Netherlands        | A/Ch/NL-Boven Leeuwen/16016151-006-010/2016 | Wageningen Bioveterinary Reseach                           | Central Veterinary Institute             |

| Segment ID | Segment | Country     | Isolate name                                      | Originating Laboratory           | Submitting Laboratory        |
|------------|---------|-------------|---------------------------------------------------|----------------------------------|------------------------------|
| EPI1019414 | HA      | Netherlands | A/Ch/NL-Den Oever/16014231-001/2016               | Wageningen Bioveterinary Reseach | Central Veterinary Institute |
| EPI1019422 | HA      | Netherlands | A/Ch/NL-Hiaure/16016112-001-005/2016              | Wageningen Bioveterinary Reseach | Central Veterinary Institute |
| EPI1019430 | HA      | Netherlands | A/Ch/NL-Rhenen/16016141-006/2016                  | Wageningen Bioveterinary Reseach | Central Veterinary Institute |
| EPI1019438 | HA      | Netherlands | A/Ch/NL-Zoeterwoude/16016484-021-025/2016         | Wageningen Bioveterinary Reseach | Central Veterinary Institute |
| EPI1019446 | HA      | Netherlands | A/Crow/NL-Oostwoud/16015372-004/2016              | Wageningen Bioveterinary Reseach | Central Veterinary Institute |
| EPI1019454 | HA      | Netherlands | A/Dk/NL-Biddinghuizen/16014829-011-015/2016       | Wageningen Bioveterinary Reseach | Central Veterinary Institute |
| EPI1019462 | HA      | Netherlands | A/Dk/NL-Biddinghuizen/16015083-016-020/2016       | Wageningen Bioveterinary Reseach | Central Veterinary Institute |
| EPI1019470 | HA      | Netherlands | A/Dk/NL-Biddinghuizen/16015145-021-025/2016       | Wageningen Bioveterinary Reseach | Central Veterinary Institute |
| EPI1019478 | HA      | Netherlands | A/Dk/NL-Kamperveen/16016104-001-005/2016          | Wageningen Bioveterinary Reseach | Central Veterinary Institute |
| EPI1019486 | HA      | Netherlands | A/Dk/NL-Rotterdam/16014008-001-005/2016           | Wageningen Bioveterinary Reseach | Central Veterinary Institute |
| EPI1019494 | HA      | Netherlands | A/Dk/NL-Stolwijk/16016291-016-020/2016            | Wageningen Bioveterinary Reseach | Central Veterinary Institute |
| EPI1019502 | HA      | Netherlands | A/Eur_Wig/NL-Akkrum/16015817-003/2016             | Wageningen Bioveterinary Reseach | Central Veterinary Institute |
| EPI1019510 | HA      | Netherlands | A/Eur_Wig/NL-De Waal (Texel)/16014891-003/2016    | Wageningen Bioveterinary Reseach | Central Veterinary Institute |
| EPI1019518 | HA      | Netherlands | A/Eur_Wig/NL-De Waal (Texel)/16014891-004/2016    | Wageningen Bioveterinary Reseach | Central Veterinary Institute |
| EPI1019526 | HA      | Netherlands | A/Eur_Wig/NL-Drieborg (Dollard)/16015513-001/2016 | Wageningen Bioveterinary Reseach | Central Veterinary Institute |

| Segment ID | Segment | Country     | Isolate name                                      | Originating Laboratory           | Submitting Laboratory        |
|------------|---------|-------------|---------------------------------------------------|----------------------------------|------------------------------|
| EPI1019534 | HA      | Netherlands | A/Eur_Wig/NL-Enumatil-Groningen/16015704-001/2016 | Wageningen Bioveterinary Reseach | Central Veterinary Institute |
| EPI1019542 | HA      | Netherlands | A/Eur_Wig/NL-Ferwert/16015273-002/2016            | Wageningen Bioveterinary Reseach | Central Veterinary Institute |
| EPI1019550 | HA      | Netherlands | A/Eur_Wig/NL-Gouda/16015824-001/2016              | Wageningen Bioveterinary Reseach | Central Veterinary Institute |
| EPI1019558 | HA      | Netherlands | A/Eur_Wig/NL-Greonterp/16015653-001/2016          | Wageningen Bioveterinary Reseach | Central Veterinary Institute |
| EPI1019566 | HA      | Netherlands | A/Eur_Wig/NL-Groningen/16015376-003/2016          | Wageningen Bioveterinary Reseach | Central Veterinary Institute |
| EPI1019574 | HA      | Netherlands | A/Eur_Wig/NL-Leeuwarden/16015699-002/2016         | Wageningen Bioveterinary Reseach | Central Veterinary Institute |
| EPI1019582 | HA      | Netherlands | A/Eur_Wig/NL-Leidschendam/16015697-007/2016       | Wageningen Bioveterinary Reseach | Central Veterinary Institute |
| EPI1019590 | HA      | Netherlands | A/Eur_Wig/NL-Reeuwijk/16015903-003/2016           | Wageningen Bioveterinary Reseach | Central Veterinary Institute |
| EPI1019598 | HA      | Netherlands | A/Eur_Wig/NL-Terschelling/16015692-010/2016       | Wageningen Bioveterinary Reseach | Central Veterinary Institute |
| EPI1019606 | HA      | Netherlands | A/Eur_Wig/NL-Vianen/16015917-006/2016             | Wageningen Bioveterinary Reseach | Central Veterinary Institute |
| EPI1019614 | HA      | Netherlands | A/Eur_Wig/NL-Walterswald/16015923-003/2016        | Wageningen Bioveterinary Reseach | Central Veterinary Institute |
| EPI1019622 | HA      | Netherlands | A/Eur_Wig/NL-West Graftdijk/16015746-003/2016     | Wageningen Bioveterinary Reseach | Central Veterinary Institute |
| EPI1019630 | HA      | Netherlands | A/Eur_Wig/NL-Wormer/16016143-002/2016             | Wageningen Bioveterinary Reseach | Central Veterinary Institute |
| EPI1019638 | HA      | Netherlands | A/Eur_Wig/NL-Zoeterwoude/16015702-010/2016        | Wageningen Bioveterinary Reseach | Central Veterinary Institute |
| EPI1019646 | HA      | Netherlands | A/Eur_Wig/NL-Zwolle/16015820-002/2016             | Wageningen Bioveterinary Reseach | Central Veterinary Institute |

| Segment ID | Segment | Country     | Isolate name                                            | Originating Laboratory           | Submitting Laboratory        |
|------------|---------|-------------|---------------------------------------------------------|----------------------------------|------------------------------|
| EPI1019654 | HA      | Netherlands | A/G_c_grebe/NL-Monnickendam/16013865-009-010/2016       | Wageningen Bioveterinary Reseach | Central Veterinary Institute |
| EPI1019662 | HA      | Netherlands | A/Go/NL-Roggebotsluis/16014462-010/2016                 | Wageningen Bioveterinary Reseach | Central Veterinary Institute |
| EPI1019670 | HA      | Netherlands | A/Gr_bk_bd_gull/NL-Slootdorp/16014102-005/2016          | Wageningen Bioveterinary Reseach | Central Veterinary Institute |
| EPI1019678 | HA      | Netherlands | A/Grey_Go/NL-Groot-Ammers/16015901-012/2016             | Wageningen Bioveterinary Reseach | Central Veterinary Institute |
| EPI1019686 | HA      | Netherlands | A/Gull/NL-Marker Wadden/16014466-020/2016               | Wageningen Bioveterinary Reseach | Central Veterinary Institute |
| EPI1019694 | HA      | Netherlands | A/Gull1/NL-Marker Wadden/16014466-011/2016              | Wageningen Bioveterinary Reseach | Central Veterinary Institute |
| EPI1019702 | HA      | Netherlands | A/Gull10/NL-Marker Wadden/16014466-014/2016             | Wageningen Bioveterinary Reseach | Central Veterinary Institute |
| EPI1019710 | HA      | Netherlands | A/L-bl-ba-gull/NL-Sovon/16014324-014/2016               | Wageningen Bioveterinary Reseach | Central Veterinary Institute |
| EPI1019718 | HA      | Netherlands | A/M_Swan/NL-Roggebotsluis/16014462-019/2016             | Wageningen Bioveterinary Reseach | Central Veterinary Institute |
| EPI1019726 | HA      | Netherlands | A/Magpie/NL-Volendam/16014331-002/2016                  | Wageningen Bioveterinary Reseach | Central Veterinary Institute |
| EPI1019734 | HA      | Netherlands | A/Mal/NL-IJsselmuiden/16015448-002/2016                 | Wageningen Bioveterinary Reseach | Central Veterinary Institute |
| EPI1019742 | HA      | Netherlands | A/Mal/NL-Mastenbroek/16015378-002/2016                  | Wageningen Bioveterinary Reseach | Central Veterinary Institute |
| EPI1019750 | HA      | Netherlands | A/P_falcon/NL-Vrouwenpolder (Zeeland)/16015510-001/2016 | Wageningen Bioveterinary Reseach | Central Veterinary Institute |
| EPI1019758 | HA      | Netherlands | A/Sea_eagle/NL-Assen/16015398-002/2016                  | Wageningen Bioveterinary Reseach | Central Veterinary Institute |
| EPI1019766 | HA      | Netherlands | A/T_Dk/NL-Almeerder Zand/16014341-003/2016              | Wageningen Bioveterinary Reseach | Central Veterinary Institute |

| Segment ID | Segment | Country     | Isolate name                                  | Originating Laboratory            | Submitting Laboratory             |
|------------|---------|-------------|-----------------------------------------------|-----------------------------------|-----------------------------------|
| EPI1019774 | HA      | Netherlands | A/T_Dk/NL-Monnickendam/16013865-006-008/2016  | Wageningen Bioveterinary Reseach  | Central Veterinary Institute      |
| EPI1019782 | HA      | Netherlands | A/T_Dk/NL-Roggebotsluis/16014462-015/2016     | Wageningen Bioveterinary Reseach  | Central Veterinary Institute      |
| EPI1019790 | HA      | Netherlands | A/T_Dk/NL-Rotterdam/16014155-001/2016         | Wageningen Bioveterinary Reseach  | Central Veterinary Institute      |
| EPI1019798 | HA      | Netherlands | A/T_Dk/NL-Werkendam/16014159-002/2016         | Wageningen Bioveterinary Reseach  | Central Veterinary Institute      |
| EPI1019806 | HA      | Netherlands | A/T_Dk/NL-Werkendam/16014159-003/2016         | Wageningen Bioveterinary Reseach  | Central Veterinary Institute      |
| EPI1019814 | HA      | Netherlands | A/T_Dk/NL-Zeewolde/16013976-001/2016          | Wageningen Bioveterinary Reseach  | Central Veterinary Institute      |
| EPI1019822 | HA      | Netherlands | A/T_Dk/NL-Zeewolde/16013976-001-003/2016      | Wageningen Bioveterinary Reseach  | Central Veterinary Institute      |
| EPI1019830 | HA      | Netherlands | A/T_Dk/NL-Zeewolde/16013976-004/2016          | Wageningen Bioveterinary Reseach  | Central Veterinary Institute      |
| EPI1019838 | HA      | Netherlands | A/T_Dk/NL-Zeewolde/16013976-004-006/2016      | Wageningen Bioveterinary Reseach  | Central Veterinary Institute      |
| EPI1019846 | HA      | Netherlands | A/T_Dk/NL-Zeewolde/16013976-005/2016          | Wageningen Bioveterinary Reseach  | Central Veterinary Institute      |
| EPI1019854 | HA      | Netherlands | A/T_Dk/NL-Zeewolde/16013976-006/2016          | Wageningen Bioveterinary Reseach  | Central Veterinary Institute      |
| EPI1019862 | HA      | Netherlands | A/T_Dk/NL-Zuidoost Beemster/16014148-002/2016 | Wageningen Bioveterinary Reseach  | Central Veterinary Institute      |
| EPI1019870 | HA      | Netherlands | A/T_Dk/NL-Zuidoost Beemster/16014148-009/2016 | Wageningen Bioveterinary Reseach  | Central Veterinary Institute      |
| EPI1019878 | HA      | Netherlands | A/Teal/NL-Ferwert/16015273-013/2016           | Wageningen Bioveterinary Reseach  | Central Veterinary Institute      |
| EPI547678  | HA      | Netherlands | A/Chicken/Netherlands/14015526/2014           | Wageningen Bioveterinary Research | Wageningen Bioveterinary Research |

| Segment ID | Segment | Country     | Isolate name                             | Originating Laboratory            | Submitting Laboratory                                   |
|------------|---------|-------------|------------------------------------------|-----------------------------------|---------------------------------------------------------|
| EPI548623  | HA      | Netherlands | A/chicken/Netherlands/14015531/2014      | Wageningen Bioveterinary Research | Wageningen Bioveterinary Research                       |
| EPI551143  | HA      | Netherlands | A/eurasian wigeon/Netherlands/emc-1/2014 | Erasmus Medical Center            | Erasmus Medical Center                                  |
| EPI551149  | HA      | Netherlands | A/eurasian wigeon/Netherlands/emc-2/2014 | Erasmus Medical Center            | Erasmus Medical Center                                  |
| EPI552760  | HA      | Netherlands | A/eurasian wigeon/Netherlands/emc-1/2014 | Erasmus Medical Center            | Erasmus Medical Center                                  |
| EPI552768  | HA      | Netherlands | A/eurasian wigeon/Netherlands/emc-2/2014 | Erasmus Medical Center            | Erasmus Medical Center                                  |
| EPI552776  | HA      | Netherlands | A/chicken/Netherlands/emc-3/2014         | Erasmus Medical Center            | Erasmus Medical Center                                  |
| EPI573163  | HA      | Netherlands | A/chicken/Netherlands/14015766/2014      | Wageningen Bioveterinary Research | Wageningen Bioveterinary Research                       |
| EPI573171  | HA      | Netherlands | A/Chicken/Netherlands/14015824/2014      | Wageningen Bioveterinary Research | Wageningen Bioveterinary Research                       |
| EPI573179  | HA      | Netherlands | A/duck/Netherlands/14015898/2014         | Wageningen Bioveterinary Research | Wageningen Bioveterinary Research                       |
| EPI573187  | HA      | Netherlands | A/chicken/Netherlands/14016437/2014      | Wageningen Bioveterinary Research | Wageningen Bioveterinary Research                       |
| EPI585111  | HA      | Netherlands | A/eurasian wigeon/Netherlands/1/2015     | Erasmus Medical Center            | Erasmus Medical Center                                  |
| EPI873659  | HA      | Netherlands | A/Eurasian wigeon/Netherlands/1/2016     | Erasmus Medical Center            | Erasmus Medical Center                                  |
| EPI959407  | HA      | Netherlands | A/Eurasian Wigeon/Netherlands/2/2016     | Erasmus Medical Center            | Erasmus Medical Center                                  |
| EPI860231  | HA      | Poland      | A/wild duck/Poland/82A/2016              | NA                                | National Veterinary Research Institut Poland, PIWet-PIB |
| EPI869924  | HA      | Poland      | A/domestic goose/Poland/33/2016          | NA                                | National Veterinary Research Institut Poland, PIWet-PIB |



| Segment ID | Segment | Country            | Isolate name                                 | Originating Laboratory                                       | Submitting Laboratory                                        |
|------------|---------|--------------------|----------------------------------------------|--------------------------------------------------------------|--------------------------------------------------------------|
| EPI869926  | HA      | Poland             | A/domestic goose/Poland/72/2016              | NA                                                           | National Veterinary Research Institut Poland, PIWet-PIB      |
| EPI869927  | HA      | Poland             | A/chicken/Poland/79A/2016                    | NA                                                           | National Veterinary Research Institut Poland, PIWet-PIB      |
| EPI869928  | HA      | Poland             | A/chicken/Poland/85A/2016                    | NA                                                           | National Veterinary Research Institut Poland, PIWet-PIB      |
| EPI869929  | HA      | Poland             | A/mute swan/Poland/108/2016                  | NA                                                           | National Veterinary Research Institut Poland, PIWet-PIB      |
| EPI869930  | HA      | Poland             | A/turkey/Poland/78/2016                      | NA                                                           | National Veterinary Research Institut Poland, PIWet-PIB      |
| EPI869931  | HA      | Poland             | A/turkey/Poland/83/2016                      | NA                                                           | National Veterinary Research Institut Poland, PIWet-PIB      |
| EPI869940  | HA      | Poland             | A/herring gull/Poland/84/2016                | NA                                                           | National Veterinary Research Institut Poland, PIWet-PIB      |
| EPI959433  | HA      | Poland             | A/chicken/Poland/114/2016                    | NA                                                           | National Veterinary Research Institut Poland, PIWet-PIB      |
| EPI959435  | HA      | Poland             | A/chicken/Poland/002/2017                    | NA                                                           | National Veterinary Research Institut Poland, PIWet-PIB      |
| EPI1044550 | HA      | Russian Federation | A/mute swan/Kaliningrad/132/2017             | NA                                                           | State Research Center of Virology and Biotechnology (VECTOR) |
| EPI1045597 | HA      | Russian Federation | A/chicken/Shchyolkovo/47/2017                | NA                                                           | State Research Center of Virology and Biotechnology (VECTOR) |
| EPI1045611 | HA      | Russian Federation | A/chicken/Rostov/44/2017                     | NA                                                           | State Research Center of Virology and Biotechnology (VECTOR) |
| EPI1045619 | HA      | Russian Federation | A/chicken/Tatarstan/88/2017                  | NA                                                           | State Research Center of Virology and Biotechnology (VECTOR) |
| EPI553349  | HA      | Russian Federation | A/wigeon/Sakha/1/2014                        | State Research Center of Virology and Biotechnology (VECTOR) | State Research Center of Virology and Biotechnology (VECTOR) |
| EPI773757  | HA      | Russian Federation | A/great crested grebe/Uvs-Nuur Lake/341/2016 | Research Institute of Experimental and Clinical Medicine     | Research Institute of Experimental and Clinical Medicine     |

| Segment ID | Segment | Country            | Isolate name                         | Originating Laboratory                                       | Submitting Laboratory                                        |
|------------|---------|--------------------|--------------------------------------|--------------------------------------------------------------|--------------------------------------------------------------|
| EPI823460  | HA      | Russian Federation | A/great crested grebe/Tyva/34/2016   | State Research Center of Virology and Biotechnology (VECTOR) | WHO National Influenza Centre Russian Federation             |
| EPI823748  | HA      | Russian Federation | A/wild duck/Tyva/35/2016             | State Research Center of Virology and Biotechnology (VECTOR) | WHO National Influenza Centre Russian Federation             |
| EPI823756  | HA      | Russian Federation | A/black-headed gull/Tyva/41/2016     | State Research Center of Virology and Biotechnology (VECTOR) | WHO National Influenza Centre Russian Federation             |
| EPI836606  | HA      | Russian Federation | A/grey heron /Uvs-Nuur Lake/20/2016  | Research Institute of Experimental and Clinical Medicine     | Research Institute of Experimental and Clinical Medicine     |
| EPI836614  | HA      | Russian Federation | A/common tern /Uvs-Nuur Lake/26/2016 | Research Institute of Experimental and Clinical Medicine     | Research Institute of Experimental and Clinical Medicine     |
| EPI869936  | HA      | Russian Federation | A/chicken/Kalmykia/2661/2016         | NA                                                           | State Research Center of Virology and Biotechnology (VECTOR) |
| EPI869938  | HA      | Russian Federation | A/chicken/Astrakhan/3131/2016        | NA                                                           | State Research Center of Virology and Biotechnology (VECTOR) |
| EPI909380  | HA      | Russian Federation | A/long-eared owl/Voronezh/15/2017    | NA                                                           | State Research Center of Virology and Biotechnology (VECTOR) |
| EPI909388  | HA      | Russian Federation | A/Ural owl/Voronezh/14/2017          | NA                                                           | State Research Center of Virology and Biotechnology (VECTOR) |
| EPI909396  | HA      | Russian Federation | A/long-eared owl/Voronezh/16/2017    | NA                                                           | State Research Center of Virology and Biotechnology (VECTOR) |
| EPI909404  | HA      | Russian Federation | A/chicken/Voronezh/18/2017           | NA                                                           | State Research Center of Virology and Biotechnology (VECTOR) |
| EPI909412  | HA      | Russian Federation | A/chicken/Voronezh/19/2017           | NA                                                           | State Research Center of Virology and Biotechnology (VECTOR) |
| EPI909420  | HA      | Russian Federation | A/chicken/Voronezh/20/2017           | NA                                                           | State Research Center of Virology and Biotechnology (VECTOR) |
| EPI909428  | HA      | Russian Federation | A/turkey/Rostov/11/2017              | NA                                                           | State Research Center of Virology and Biotechnology (VECTOR) |
| EPI909436  | HA      | Russian Federation | A/goose/Krasnodar/3144/2017          | NA                                                           | State Research Center of Virology and Biotechnology (VECTOR) |

| Segment ID | Segment | Country            | Isolate name                                    | Originating Laboratory                                   | Submitting Laboratory                                        |
|------------|---------|--------------------|-------------------------------------------------|----------------------------------------------------------|--------------------------------------------------------------|
| EPI909444  | HA      | Russian Federation | A/mute swan/Krasnodar/25/2017                   | NA                                                       | State Research Center of Virology and Biotechnology (VECTOR) |
| EPI909452  | HA      | Russian Federation | A/wild duck/Tatarstan/3059/2016                 | NA                                                       | State Research Center of Virology and Biotechnology (VECTOR) |
| EPI909460  | HA      | Russian Federation | A/chicken/Kalmykia/2643/2016                    | NA                                                       | State Research Center of Virology and Biotechnology (VECTOR) |
| EPI925956  | HA      | Russian Federation | A/gadwall/Chany/97/2016                         | Research Institute of Experimental and Clinical Medicine | WHO National Influenza Centre Russian Federation             |
| EPI926605  | HA      | Russian Federation | A/domestic duck/Siberia/50K/2016                | NA                                                       | Research Institute of Experimental and Clinical Medicine     |
| EPI926613  | HA      | Russian Federation | A/domestic duck/Siberia/103/2016                | Research Institute of Experimental and Clinical Medicine | Research Institute of Experimental and Clinical Medicine     |
| EPI961449  | HA      | Russian Federation | A/gadwall/Kurgan/2442/2016                      | NA                                                       | State Research Center of Virology and Biotechnology (VECTOR) |
| EPI961459  | HA      | Russian Federation | A/chicken/Sergiyev Posad/38/2017                | NA                                                       | State Research Center of Virology and Biotechnology (VECTOR) |
| EPI961467  | HA      | Russian Federation | A/chicken/Sergiyev Posad/39/2017                | NA                                                       | State Research Center of Virology and Biotechnology (VECTOR) |
| EPI576384  | HA      | Sweden             | A/MuteSwan/Sweden/SVA150311KU0277/SZ502/2015    | National Veterinary Institute                            | National Veterinary Institute                                |
| EPI576391  | HA      | Sweden             | A/MuteSwan/Sweden/SVA150313KU0141/SZ543/2015    | National Veterinary Institute                            | National Veterinary Institute                                |
| EPI863826  | HA      | Sweden             | A/Chicken/Sweden/SVA161122KU0453/SZ0209316/2016 | National Veterinary Institute                            | National Veterinary Institute                                |
| EPI863834  | HA      | Sweden             | A/Chicken/Sweden/SVA161122KU0453/SZ0209317/2016 | National Veterinary Institute                            | National Veterinary Institute                                |
| EPI863849  | HA      | Sweden             | A/Chicken/Sweden/SVA161122KU0453/SZ0209318/2016 | National Veterinary Institute                            | National Veterinary Institute                                |
| EPI863857  | HA      | Sweden             | A/Chicken/Sweden/SVA161122KU0453/SZ0209321/2016 | National Veterinary Institute                            | National Veterinary Institute                                |

| Segment ID | Segment | Country        | Isolate name                                             | Originating Laboratory                   | Submitting Laboratory                                    |
|------------|---------|----------------|----------------------------------------------------------|------------------------------------------|----------------------------------------------------------|
| EPI863865  | HA      | Sweden         | A/Common Goldeneye/Sweden/SVA161117KU0322/SZ0002165/2016 | National Veterinary Institute            | National Veterinary Institute                            |
| EPI969254  | HA      | Switzerland    | A/Tufted Duck/Switzerland/V237/2016                      | Institute of Virology and Immunology IVI | Faculty of Veterinary Medicine at the University of Bern |
| EPI588952  | HA      | Taiwan         | A/goose/Taiwan/a015/2015                                 | Animal Health Research Institute         | Animal Health Research Institute                         |
| EPI588976  | HA      | Taiwan         | A/duck/Taiwan/a068/2015                                  | Animal Health Research Institute         | Animal Health Research Institute                         |
| EPI961933  | HA      | Taiwan         | A/chicken/Taiwan/x37/2016                                | NA                                       | Animal Health Research Institute                         |
| EPI547673  | HA      | United Kingdom | A/duck/England/36254/14                                  | Animal and Plant Health Agency (APHA)    | Animal and Plant Health Agency (APHA)                    |
| EPI550848  | HA      | United Kingdom | A/duck/England/36038/14                                  | Animal and Plant Health Agency (APHA)    | Animal and Plant Health Agency (APHA)                    |
| EPI550849  | HA      | United Kingdom | A/duck/England/36226/14                                  | Animal and Plant Health Agency (APHA)    | Animal and Plant Health Agency (APHA)                    |
| EPI868848  | HA      | United Kingdom | A/turkey/England/052131/2016                             | Animal and Plant Health Agency (APHA)    | Animal and Plant Health Agency (APHA)                    |
| EPI942935  | HA      | United Kingdom | A/turkey/England/003778/2017                             | Animal and Plant Health Agency (APHA)    | Animal and Plant Health Agency (APHA)                    |
| EPI942943  | HA      | United Kingdom | A/chicken/Wales/000023/2016                              | Animal and Plant Health Agency (APHA)    | Animal and Plant Health Agency (APHA)                    |
| EPI943320  | HA      | United Kingdom | A/pochard_duck/England/SA12_157809/2016                  | Animal and Plant Health Agency (APHA)    | Animal and Plant Health Agency (APHA)                    |
